# Supplementary material
Source: Research Square preprint supplement (doi:10.21203/rs.3.rs-9956382/v1)
Supplement: Supplementary file 3 [file e298e40da103681b3320c916.docx]

Appendix 1: Protocol Intercomparison: Detailed Outcomes

**Accounting Methods Dictate Carbon Removal Credit Integrity and Outcomes**

Sarah L. Nordahl1,2, Evan D. Sherwin1, Caspar Donnison3, Kimberley K. Mayfield3, Sarah Baker3, Corinne D. Scown1,2,4

1 Energy Analysis Division, Lawrence Berkeley National Laboratory, Berkeley, CA 94720, USA

2 Life-cycle, Economics, and Agronomy Division, Joint BioEnergy Institute, Lawrence Berkeley National Laboratory, Emeryville, CA 94608, USA

Lawrence Livermore National Laboratory, Livermore, CA, 94550, USA

4 Energy and Biosciences Institute, University of California, Berkeley, CA 94720, USA

# Table of Contents:

1. Relevance and Summary
2. DACS Protocols
3. BiCRS Protocols
4. Land-Based Mineralization Protocols
5. Enhanced Rock Weathering Protocols

# 1. Relevance and Summary

Most existing protocols from CDR registries tend to exist somewhere between activity-level LCA and the NFF. Protocols tend to use intermediate system boundaries, placing guardrails on activity-level LCA or creating allowances within frameworks similar to the NFF. Because most protocols occupy this middle ground, they are not necessarily grounded in a single coherent framing.[1](https://sciwheel.com/work/citation?ids=18741066&pre=&suf=&sa=0) Guardrails can sometimes appear to be applied ad hoc, with the goal of preventing specific outcomes deemed undesirable.[1](https://sciwheel.com/work/citation?ids=18741066&pre=&suf=&sa=0)

We review protocols, spanning a range of relevant technology classes of engineered CDR. This includes direct air capture and storage (DACS) protocols from Isometric[2](https://sciwheel.com/work/citation?ids=18503548&pre=&suf=&sa=0) and the government of Canada,[3](https://sciwheel.com/work/citation?ids=18503575&pre=&suf=&sa=0) varied biomass carbon removal and storage (BiCRS) protocols from Isometric,[4–7](https://sciwheel.com/work/citation?ids=18503542,18503546,18503545,18503544&pre=&pre=&pre=&pre=&suf=&suf=&suf=&suf=&sa=0,0,0,0) Puro.Earth,[8,9](https://sciwheel.com/work/citation?ids=18503562,18503558&pre=&pre=&suf=&suf=&sa=0,0) Verra,[10](https://sciwheel.com/work/citation?ids=18503573&pre=&suf=&sa=0) Climate Action Reserve,[11](https://sciwheel.com/work/citation?ids=18503541&pre=&suf=&sa=0) and Carbon Standards International,[12](https://sciwheel.com/work/citation?ids=18503537&pre=&suf=&sa=0) bioenergy with carbon capture (BECCS)-specific protocols from Isometric,[13](https://sciwheel.com/work/citation?ids=18503557&pre=&suf=&sa=0) Verra,[14](https://sciwheel.com/work/citation?ids=18503595&pre=&suf=&sa=0) and Gold Standard,[15](https://sciwheel.com/work/citation?ids=18503598&pre=&suf=&sa=0) enhanced rock weathering protocols from Isometric[16](https://sciwheel.com/work/citation?ids=18503556&pre=&suf=&sa=0) and Puro.Earth,[17](https://sciwheel.com/work/citation?ids=18503566&pre=&suf=&sa=0) and other varied, land-based mineralization protocols from Isometric,[18](https://sciwheel.com/work/citation?ids=18503555&pre=&suf=&sa=0) Puro.Earth,[19](https://sciwheel.com/work/citation?ids=18503564&pre=&suf=&sa=0) Verra,[20](https://sciwheel.com/work/citation?ids=18503580&pre=&suf=&sa=0) and Gold Standard.[21](https://sciwheel.com/work/citation?ids=18503579&pre=&suf=&sa=0)

The reviewed DACS protocols are generally aligned with the NFF, only crediting the carbon effectively stored underground for a given removal timeframe and applying a penalty equivalent to emissions from the DACS facility construction, operation, and maintenance. Isometric does allow for allocation of emissions to co-products, but in most DACS cases, this is not a substantial credit.[2](https://sciwheel.com/work/citation?ids=18503548&pre=&suf=&sa=0) There is no substantial difference in quantified removal for DACS between activity-level LCA and the NFF. Variability in accounting results for DACS tend to stem from energy-related emissions accounting (i.e. impacts associated with electricity consumption).[22](https://sciwheel.com/work/citation?ids=18705246&pre=&suf=&sa=0)

The most notable divergence from the NFF comes from the non-DACS protocols, many of which allow for burden-free accounting for inputs deemed waste products and/or allocation of emissions to co-products. These allowances create flexibility for CDR suppliers, but are inherently based on current day counterfactuals of existing supply chains. Over time, as other supply chains decarbonize and CDR becomes more relevant, these allowances can decrease and may reveal systems that do not achieve a net flux of CO2 out of the atmosphere. In the context of DACS, these allowances may not be substantial, but when considering other CDR systems, this same perspective may incentivize behaviors that do not contribute to the long-term goals of CDR. Given the price premium that CDR currently commands over mitigation, there may be an incentive for both buyers and sellers of credits to leverage any methodological gray areas in LCA-based frameworks to classify mitigation activities as CDR.

**References**

[1. Herbstritt, S. *et al.* *Strengthening Biomass Carbon Removal and Storage (BiCRS) Protocols*. (2026).](https://sciwheel.com/work/bibliography/18741066)

[2. Isometric. DAC Protocol - Direct Air Capture v1.2. *Isometric* https://registry.isometric.com/protocol/direct-air-capture (2025).](https://sciwheel.com/work/bibliography/18503548)

[3. Environment and Climate Change Canada. *Direct air carbon dioxide capture and geological storage: federal offset protocol, public consultation, preliminary draft*. (2025).](https://sciwheel.com/work/bibliography/18503575)

[4. Isometric. BiCRS Protocol - Subsurface Biomass Carbon Removal and Storage v1.0. *Isometric* https://registry.isometric.com/protocol/subsurface-biomass/1.0 (2025).](https://sciwheel.com/work/bibliography/18503542)

[5. Isometric. BiCRS Protocol - Biochar Production and Storage v1.1. *Isometric* https://registry.isometric.com/protocol/biochar/1.0 (2025).](https://sciwheel.com/work/bibliography/18503546)

[6. Isometric. BiCRS Protocol - Bio-oil Geological Storage v1.1. *Isometric* https://registry.isometric.com/protocol/bio-oil-geological-storage (2025).](https://sciwheel.com/work/bibliography/18503545)

[7. Isometric. BiCRS Protocol - Biomass Geological Storage v1.1. *Isometric* https://registry.isometric.com/protocol/biomass-geological-storage (2025).](https://sciwheel.com/work/bibliography/18503544)

[8. Puro.Earth. *Terrestrial Storage of Biomass - Methodology for CO2 Removal v.1*. (2023).](https://sciwheel.com/work/bibliography/18503562)

[9. Puro.Earth. *Biochar - Methodology for CO2 Removal v.1*. (2025).](https://sciwheel.com/work/bibliography/18503558)

[10. Verra. *VM0044 - Biochar Utilization in Soil and Non-Soil Applications v1.2*. (2025).](https://sciwheel.com/work/bibliography/18503573)

[11. Climate Action Reserve. *U.S. and Canada Biochar Protocol Version 1.0*. (2024).](https://sciwheel.com/work/bibliography/18503541)

[12. Ithaka Institute. *Global Artisan C-Sink - Standard for Carbon Sink Certification for artisan biochar production*. (2024).](https://sciwheel.com/work/bibliography/18503537)

[13. Isometric. BiCRS Protocol - Biogenic Carbon Capture and Storage v1.1. *Isometric* https://registry.isometric.com/protocol/biogenic-capture-and-storage/1.1 (2025).](https://sciwheel.com/work/bibliography/18503557)

[14. Verra & CCS+ Initiative. *VM0059 - CO2 Capture from Bioenergy v1.0*. (2025).](https://sciwheel.com/work/bibliography/18503595)

[15. Gold Standard. *Biomass Fermentation with Carbon Capture and Geologic Storage v2.0*. (2025).](https://sciwheel.com/work/bibliography/18503598)

[16. Isometric. EW Protocol - Enhanced Weathering in Agriculture v1.1. *Isometric* https://registry.isometric.com/protocol/enhanced-weathering-agriculture (2025).](https://sciwheel.com/work/bibliography/18503556)

[17. Puro.Earth. *Enhanced Rock Weathering - Methodology for CO2 Removal v.2*. (2024).](https://sciwheel.com/work/bibliography/18503566)

[18. Isometric. Mineralization Protocol - Open System Ex-situ Mineralization v1.0. *Isometric* https://registry.isometric.com/protocol/open-system-ex-situ-mineralization/1.0/ctn_1JFJ4F6FF1S00M39 (2025).](https://sciwheel.com/work/bibliography/18503555)

[19. Puro.Earth. *Carbonated Materials - Methodology for CO2 Removal v.2*. (2023).](https://sciwheel.com/work/bibliography/18503564)

[20. Verra, Carbon Cure & Carbonomics. *VM0043 - CO2 Utilization in Concrete Production v1.1*. (2024).](https://sciwheel.com/work/bibliography/18503580)

[21. Gold Standard. *Carbon Mineralisation Using Reactive Mineral Waste v2.0*. (2025).](https://sciwheel.com/work/bibliography/18503579)

[22. Hanes, R. J. *et al.* Energy Emissions Accounting Methods Can Determine Whether Direct Air Capture with Storage Achieves Net Removal. *Environ. Sci. Technol.* (2026) doi:10.1021/acs.est.5c13494.](https://sciwheel.com/work/bibliography/18705246)

# 2. DACS Protocols

This review for DACS includes the following protocols:

- Isometric Direct Air Capture Protocol
- Government of Canada, Direct Air Carbon Dioxide Capture and Geological Storage Federal Offset Protocol

Tables that do not include a column for data source requirements indicate that the protocols did not specify any recommended or required data sources.

Note: Text in italics are directly taken from the standards/protocols. Footnotes indicate the specific section for each component in the respective protocol.

### Table A1-1. Project siting and construction emissions

| Protocol | Scope |
| --- | --- |
| Isometric | *Embodied emissions associated with equipment and materials manufactured for project establishment. Emissions related to construction and installation of the project site. Any embodied energy and transport emissions associated with surveys or feasibility studies required for establishment of the project site.*[[1]](#footnote-0) |
| Government of Canada | None. The following emissions are excluded:  *Production of construction materials, land clearing and soil carbon loss from construction of project facilities and infrastructure, construction of project facilities and infrastructure.*[[2]](#footnote-1) |

### Table A1-2. DACS transportation emissions

| Protocol | Scope | Data source requirement |
| --- | --- | --- |
| Isometric | *Transport emissions associated with transporting materials and equipment to the project site. Electricity or fuel used for operation of a pipeline or similar non-mobile CO2 transportation process maintenance of transportation infrastructure including maintenance, repair, replacement and refurbishment. Additionally, transport of consumables used for the operation. [[3]](#footnote-2) Include all emissions associated with the fuel-cycle such as direct combustion of fuel as well as indirect upstream emissions, including production and distribution of fuel or electricity.*  *Embodied life cycle emission factors must be used for vehicles and infrastructure produced, constructed, and utilized for the CO2 removal project, and this must be calculated in addition to the Energy Usage or Distance-Based Methods.*[[4]](#footnote-3) | Delivery of material input consumed at capture facility. [[5]](#footnote-4) |
| Government of Canada | Can be calculated using energy usage or distance-based methods. [[6]](#footnote-5) | Emission factor for CO2, CH4, N2O provided for fuels provided in the *Emission Factors and Reference Values document*[[7]](#footnote-6) |

### Table A1-3. DACS energy (electricity and fuel) use emissions

| Protocol | Scope | Data source requirement | Miscellaneous |
| --- | --- | --- | --- |
| Isometric | *The emissions associated with energy use must account for all operations that consume energy within the CDR project processes, through the usage of both electricity and fuel.*  Electricity emission factors represent the life cycle of the fuel used to generate electricity and of the generator.[[8]](#footnote-7) | If project is grid powered, use *DOE National Transmission Needs Study* emission factor for grid electricity.  No specific emission factor source is required for projects with PPA, but factors must include generator and fuel. [[9]](#footnote-8) | Differentiates accounting for facilities consuming under (non-intensive) and over 200 GWh (intensive).  Annual volumetric matching for non-intensive facilities, hourly volumetric for intensive.  Waste heat can be used as a burden free energy input. [[10]](#footnote-9) |
| Government of Canada | Energy and fuel used to operate the capture process, transport infrastructure and operation of injection infrastructure.  *Emissions associated with the extraction, processing and delivery of fossil fuels used on-site for the generation of heat, electricity and energy consumed by the project*[[11]](#footnote-10). Waste heat can be used as a burden-free input. | *GHG consumption intensity emission factor for grid electricity from the project jurisdiction, or an emission factor for electricity procured through a power purchase agreement.*[[12]](#footnote-11) | *If the proponent procures renewable energy for a project (e.g. for the operation of the capture facility), they must ensure and demonstrate that the renewable energy is additional, meaning the renewable energy is generated explicitly for the project and is not displaced and removed from the grid or pre-existing end users*[[13]](#footnote-12) |

### Table A1-4. DACS operational and direct emissions

| Protocol | Scope |
| --- | --- |
| Isometric | All emissions associated with the DAC and storage processes process, including use of consumables, maintenance of the equipment and infrastructure, waste processing. *Any intentional or unintentional release of emissions due to maintenance, emergency shutdown of equipment, faulty equipment, etc*. Any emissions incurred by the monitoring process, including sampling and surveys, need to be accounted for. Additionally, must account for embodied emissions of consumables and other miscellaneous emissions such as staff travel.[[14]](#footnote-13) |
| Government of Canada | Operation of capture facility, transport infrastructure, and injection infrastructure. Embodied emissions of consumables and materials.  Loss and disposal of consumables and materials.  Vented and fugitive emissions (leaks) from injection infrastructure.  The following emissions are **excluded**:  Vented emissions at capture facility and fugitive emissions at capture facility.  Vented emissions throughout transport infrastructure and fugitive emissions throughout transport infrastructure.[[15]](#footnote-14) |

### Table A1-5. DACS end-of-life emissions

| Protocol | Scope |
| --- | --- |
| Isometric | Anticipated end-of-life emissions including deconstruction and disposal of equipment and infrastructure. [[16]](#footnote-15) |
| Government of Canada | Emissions associated with *Decommissioning of project facilities and infrastructure are* **excluded**. Emissions associated with the monitoring of storage in the reservoir need to be accounted for. [[17]](#footnote-16) |

### Table A1-6. DACS counterfactual

| Protocol | Scope |
| --- | --- |
| Isometric | *The counterfactual of qualifying projects is typically considered to be zero.*[[18]](#footnote-17) |
| Government of Canada | The counterfactual is zero.[[19]](#footnote-18) |

### Table A1-7. DACS economic leakage (market-mediated impacts)

| Protocol | Scope |
| --- | --- |
| Isometric | *For a DAC Project, market leakage emissions associated with the replacement of consumables used must be considered as a minimum. Project Proponents may also consider the impact of project operations on potential increased use of rare-earth materials for the production of sorbents, land use change, and increased strain on existing CO2 transportation and storage infrastructure.* [[20]](#footnote-19) |
| Government of Canada | *Since the baseline scenario of a project is the absence of the geological storage of direct air captured CO2 within the project site, there is no leakage risk for projects under this protocol.*[[21]](#footnote-20) |

### Table A1-8. DACS multifunctionality

| Protocol | Scope |
| --- | --- |
| Isometric | Co-product allocation for coproducts.[[22]](#footnote-21) Emissions for inputs considered waste products may be excluded.[[23]](#footnote-22) |
| Government of Canada | *Since the baseline scenario of a project is the absence of the geological storage of direct air captured CO2 within the project site, there is no leakage risk for projects under this protocol.*[[24]](#footnote-23) |

### Table A1-9. DACS net removal calculation

| Protocol | Net removal calculation |
| --- | --- |
| Isometric | The gross CO2 stored, minus all project emissions, minus leakage emissions, minus the counterfactual (which is 0) [[25]](#footnote-24) |
| Government of Canada | Gross removals, minus all project emissions, minus the baseline removal (0) [[26]](#footnote-25) |

### Table A1-10. DACS baseline definitions

| Protocol | Baseline Definition |
| --- | --- |
| Isometric | *The baseline scenario for a DAC project assumes the activities associated with The Project do not take place and any associated infrastructure is not built.*[[27]](#footnote-26) |
| Government of Canada | The baseline is zero[[28]](#footnote-27). |

### Table A1-11. DACS storage durability, permanence, and timing of carbon removals.

| Protocol | Durability and Permanence Requirements |
| --- | --- |
| Isometric | >1000 years[[29]](#footnote-28) |
| Government of Canada | 100 years[[30]](#footnote-29) |

### Table A1-12. DACS additionality requirements

| Protocol | Requirements |
| --- | --- |
| Isometric | Financial, Regulatory, Market Adoption and Environmental. [[31]](#footnote-30) |
| Government of Canada | Regulatory[[32]](#footnote-31) |

# 3. BiCRS Protocols

Note: Text in italics are directly taken from the standards/protocols. Footnotes indicate the specific section for each component in the respective protocol.

### Table A1-13. BiCRS project siting and construction emissions.

| **Protocol** | **Scope** | **Data Source Requirements** |
| --- | --- | --- |
| Isometric | Surveys and feasibility studies.  Procuring and transporting material to project sites.  Installation and construction, including groundwork and waste processing activities.  Direct land use changes due to project establishment.[[33]](#footnote-32) Account for all equipment[[34]](#footnote-33)  *Use cradle-to-grave emission factors*. | None specified |
| Puro | Carbon emitted in the fabrication and construction of infrastructure and/or equipment assets, and in direct land-use conversion associated with the production facility and supporting infrastructure.[[35]](#footnote-34)    Shall be cradle-to-grave, including all steps from material extraction to waste disposal. | EN 15804+A2, EN 15978, or ISO 21930:2017. Alternatively, recent monetary emission factors (e.g., kg CO2e per USD spent) may be used as a proxy for estimating embodied emissions based on capital expenditure.  Direct land use change shall be quantified using either the default values for land conversion available in the IPCC Guidelines for National Greenhouse Gas Inventories 39 (IPCC, 2006) (IPCC, 2019) (Tier 1), or country-specific values (Tier 2), or data specific to the project (Tier 3).)[[36]](#footnote-35) |
| Verra | Do not account for establishment emissions[[37]](#footnote-36). | N/A |
| CAR | Transportation of equipment to the facility.[[38]](#footnote-37) | None specified |
| CSI | Manufacture and transportation of kiln, pump for quenching water, blender, and equipment used for application. | 20 kg CO2/ton biochar for all establishment emissions, provided all transportation is 100 km or less.[[39]](#footnote-38) |

### Table A1-14. BiCRS transportation emissions.

| Protocol | Scope | Data Source Requirements |
| --- | --- | --- |
| Isometric | Include all emissions associated with the fuel-cycle such as direct combustion of fuel as well as indirect upstream emissions, including production and distribution of fuel or electricity.  Embodied life cycle emission factors must be used for vehicles and infrastructure produced, constructed, and utilized for the CO2 removal project, and this must be calculated in addition to the Energy Usage or Distance-Based Methods.[[40]](#footnote-39) | None specified |
| Puro | Direct emissions only for transportation of:  Biomass to production facility.  Biochar from production facility to final point of use. [[41]](#footnote-40) | ISO 14083:2023 or GLEC Framework v3.1 |
| Verra | Direct emissions only for transportation of:  Feedstock from production to processing facilities.  Biochar from processing facility to end-use application site.  Only for transportation distances over 200 km.[[42]](#footnote-41) | Can be calculated measuring fuel consumption and using an emission factor for that fuel or *using conservative default values* based on the quantity of freight transported, the distance and the class of vehicle[[43]](#footnote-42) |
| CAR | Direct emissions only for transportation of:  Biomass feedstock from source to processing facility. Processed biochar to end use facility. [[44]](#footnote-43) | *Transportation emissions may be calculated based on fuel records, if available, or on transportation mode, mass of feedstock transported, and distance traveled. Default emissions factors for either approach are provided in the Biochar CRT Calculation Tool*[[45]](#footnote-44) |
| CSI | Direct emissions only for transportation of:  Feedstock from production to processing facilities.  Processed biochar to application sites.  Only for transportation distances over 100 km.[[46]](#footnote-45) |  |

### Table A1-15. BiCRS energy (electricity and fuel) use emissions

| Protocol | Scope | Data Source Requirements | Miscellaneous |
| --- | --- | --- | --- |
| Isometric | *The emissions associated with energy use must account for all operations that consume energy within the CDR project processes, through the usage of both electricity and fuel.*  Electricity emission factors represent the life cycle of the fuel used to generate electricity and of the generator. [[47]](#footnote-46) | If project is grid powered, use DOE National Transmission Needs Study emission factor for grid electricity.  No specific emission factor source is required for projects with PPA, but factors must include generator and fuel and may use source *factors such as GREET, Ecoinvent and USLCI*.[[48]](#footnote-47) | Differentiates accounting for facilities consuming under (non-intensive) and over 200 GWh (intensive).  Annual volumetric matching for non-intensive facilities, hourly volumetric for intensive.  Waste heat that cannot be recovered for other purposes is eligible. [[49]](#footnote-48) |
| Puro | Electricity and fuel consumption to produce biochar as well as end application activities.[[50]](#footnote-49) | Must use an emission factor that is geographically relevant and accounts for whole generation life cycle.  No specific data source required. | Can use RECs to claim reduced GHG intensity if they are in the same grid region and must match low-carbon energy reported by project.[[51]](#footnote-50) |
| Verra | Electricity and fuels used for pre-treatment of feedstock. Electricity and fuels used for the purpose of pyrolysis.  *If the energy source is renewable, emissions are zero.*[[52]](#footnote-51) | Emission factor used if using grid-connected electricity and for fuel use a fuel specific emission factor. [[53]](#footnote-52) | Additionally, leakage emissions associated with increased electricity compared to the baseline need to be accounted for. [[54]](#footnote-53). |
| CAR | Electricity, fuel and heat use for all project activities[[55]](#footnote-54) | Use eGRID for grid-connected facilities and US EPA GHG Emissions Hub for non-grid connected facilities.[[56]](#footnote-55) |  |
| CSI | Energy emissions associated with biomass cultivation, harvesting crushing, pyro-gas combustion, milling, blending and soil or material incorporation.  *As the biochar production in Kon-Tiki kilns does not consume any electricity or fuel, the carbon footprint of the biochar production with this technology is very low*.  Electricity used by the CDR technology itself is excluded from the scope if using this technology. [[57]](#footnote-56) | No specific data source required. | As the biochar production in Kon-Tiki kilns does not consume any electricity or fuel, the carbon footprint of the biochar production with this technology is very low. |

### Table A1-16. BiCRS operation and direct emissions

| Protocol | Scope | Data Source Requirements |
| --- | --- | --- |
| Isometric | Direct emissions from:  Biomass feedstock processing, pyrolysis or other processes.  Maintenance of the project site.  Use of consumables including upstream emissions.  Waste processing and disposal.  Bio-oil/biochar processing and characterization (sampling). Temporary storage of processed biomass  Bio-oil/biochar storage and injection. Sampling and all other MMRV activities.  Staff travel and surveys. [[58]](#footnote-57) | None specified |
| Puro | Direct emissions from:  Biomass handling, drying and chipping.  Operation of the pyrolysis reactor and post-pyrolysis processes, biochar quenching and handling.  Biochar end use or application[[59]](#footnote-58) | None specified |
| Verra | Direct emissions from:  Applying the biochar in soil or non-soil applications. [[60]](#footnote-59)  Exclude all pyrolysis emissions from facilities that:  Do not emit pyrolytic greenhouse gases  Recover at least 70% of the heat produced.  Have pollution controls such as thermal oxidizers to meet regulatory thresholds.  Measure and report production temperature.  Include methane emissions only from pyrolysis facilities that do not meet one or more of the above conditions | None specified |
| CAR | Direct emissions from:  Feedstock drying and processing.  Thermochemical conversion, including methane.  Embodied emissions from:  All fuel used (use a fuel emissions factor when using fuel). [[61]](#footnote-60) | None specified |
| CSI | Direct methane emissions only from pyrolysis. | 30 kg of CH4 per ton of biochar for Kon-Tiki kilns. Pro rata factor for TLUD stoves[[62]](#footnote-61) based on feedstock and biochar masses and LLVs. |

### Table A1-17. BiCRS end-of-life emissions

| Protocol | Scope |
| --- | --- |
| Isometric | *All emissions associated with activities that are anticipated to occur after the Reporting Period but are directly or indirectly related*. Sampling for MRV beyond the injection phase.  Deconstruction of the plant.  Waste handling at the end of the project lifetime. [[63]](#footnote-62) |
| Puro | LCA factors must account for downstream emissions for all processes. [[64]](#footnote-63) |
| Verra | Emissions associated with biochar application, however no accounting for emissions associated with decommissioning and waste disposal.[[65]](#footnote-64) |
| CAR | Emissions from end application of biochar accounted for. However, no emissions from plant decommissioning or ongoing monitoring accounted for. [[66]](#footnote-65) |
| CSI | Not addressed. |

### Table A1-18. BiCRS counterfactuals definitions and emissions

| Protocol | Scope | Approach | Miscellaneous |
| --- | --- | --- | --- |
| Isometric | Counterfactual Storage: CO2 that would have been permanently stored in the biomass in the absence of the CDR project. Known as ineligible biomass. Biomass, whose counterfactual fate is being released in the next 15 years is eligible biomass. [[67]](#footnote-66) | *If the counterfactual fate of the biomass includes the stored biogenic C being emitted as GHGs with a GWP100>1, the total biomass eligible is equal to the minimum of:*  *(1) the CO2e (evaluated at GWP100) of counterfactually released GHGs emitted within 15 years*  *(2) the total stored CO2 in the biomass minus the CO2 in biomass that would not have counterfactually been released within 50 years.*  *Landfilled wood is not an eligible feedstock, unless the Project Proponent can demonstrate the counterfactual fate would release all stored biogenic carbon within 15 years.*  *Feedstocks that are sourced through government managed or funded wildfire mitigation or restoration activities will be assigned a counterfactual storage value of 0.*  *Applicable to non-forestry feedstocks: The biomass feedstock was not grown for the purposes of energy production and does not have a likely counterfactual energy production use.*[[68]](#footnote-67) | Note: Biomass that decays but can still lead to durable storage e.g.: corn stover decay leading to increase soil C content may still be ineligible. Proponent must show sourcing practices have no impact on durable carbon stocks. |
| Puro | Counterfactual emissions for eligible feedstock are 0. [[69]](#footnote-68) | *Mitigation of ecological leakage relating to negative effects on the nearby land and ecosystems surrounding the areas where biomass is sourced from is achieved if the biomass used is demonstrated to be eligible as per the Puro Biomass Sourcing Criteria. This leakage source can be set to zero in the quantification.* [[70]](#footnote-69) | None specified. |
| Verra | Counterfactual fate is the feedstock would have otherwise decomposed or burned for non-energy purposes. *Emission avoidance as zero following a conservative scenario.*[[71]](#footnote-70) | None specified. | None specified. |
| CAR | *There would be emissions expected to be associated with the fate of feedstock biomass in the absence of the project, it is conservative to assume a value of zero 0.*[[72]](#footnote-71) | *Although some carbon in eligible waste and by-product feedstock types may be sequestered under the baseline scenario, the vast majority of such carbon combusts or decomposes over relatively short time scales.*[[73]](#footnote-72) | None specified. |
| CSI | Depending on the alternative fate of feedstock, there can be a credit for avoided methane emissions. [[74]](#footnote-73) | None specified. | None specified. |

### Table A1-19. BiCRS economic leakage (market-mediated impacts)

| Protocol | Scope | Approach |
| --- | --- | --- |
| Isometric | For biomass projects, replacements emissions (to compensate for biomass that was serving another purpose) are the minimum leakage. Projects that would lead to ecological leakage associated with land use change are ineligible. [[75]](#footnote-74) | Replacement emissions: The addition of replacement emissions associated with energy, embodiment and transportation of new feedstock serving a market need the CDR project could be displacing. Cases where replacement emissions are exempt are the following:  *If the feedstock currently serves no purpose, such as mill residues in a stockpile or forest residues sitting on the forest floor, there are deemed to be no replacement emissions.*  *For project feedstock usage above the percentage of what is theoretically possible to use for a given purpose (the ‘Sustainable Use Rate’) the feedstock would be considered true waste and therefore not require calculation of replacement emissions.*  For environmental services replacement emissions, the mass of replacement can be used to calculate the emissions. For example, the fertilizer capacity from feedstock that needs to be replaced can be calculated by sampling the amount of nitrogen, phosphorus and potassium in each batch. Amount in counterfactual scenario must account for replacing same amount of NPK. [[76]](#footnote-75) |
| Puro | Must account for leakage emissions for both ecosystem changes and market-shifting activity.  Identify leakage sources: land use changes due to project activities and biomass sourcing. Market activity shifting in the agriculture and forestry sectors relating to the use of feedstock or use of land. [[77]](#footnote-76) | Leakage must be calculated depending on the type of facility:  New facility – replacement emissions from material and energy due to the use of feedstock or land that were used for other purposes.  Retrofit facility – Replacement emissions from reduced bioenergy or biomaterial output. Charcoal repurpose – Replacement emissions from diverting charcoal Ecologic Leakage must be mitigated by defining a land area of impact and showing that activities won’t significantly impact land coverage, local hydrology and the carbon stocks.  If biomass meets sourcing criteria, leakage for sourcing is considered 0 for both ecologic and market leakage. Market leakage must be mitigated when using a nutrient-rich feedstock, by showing biochar is applied to soil or showing that there is an oversupply of nutrient rich feedstock in the area. In a retrofit facility, by showing sourcing does not impact energy or material outcome. In a charcoal repurpose, if no reductions in the charcoal volume used for other purposes are observed.  For sources not mitigated, market leakage calculated as the net change in product between project and baseline, multiplied by a representative emission factor to that service. Ecologic leakage is calculated as the quantity of feedstock with high risk of indirect land use change, multiplied by its lower calorific value multiplied by an indirect land use change factor and multiplied by an attribution factor. Protocol provides value for indirect land use change factors.[[78]](#footnote-77) |
| Verra | Leakage due to activity shift is considered 0, as purposefully grown biomass is not allowed. Leakage due to diversion is considered negligible as only waste feedstocks or those that would been combusted are eligible. Thus, no economic or ecological leakage accounted for.[[79]](#footnote-78) | Not specified. |
| CAR | Applies for purpose grown feedstocks and those diverted from bioenergy.[[80]](#footnote-79) | Since purpose grown are only eligible in marginal lands, no indirect land use emissions are considered and thus leakage is considered 0. If diversion from bioenergy, no leakage is accounted for if a reduction in energy production from the bioenergy facility is below 5%, however, for amounts higher than this percentage, the replacement emissions must be calculated using electrical grid emissions from the biochar facility location.[[81]](#footnote-80) |
| CSI | Not considered | Not specified. |

### Table A1-20. BiCRS multifunctionality

| Protocol | Scope |
| --- | --- |
| Isometric | Embodied emissions for inputs considered to be waste can be excluded from the GHG accounting.[[82]](#footnote-81) In terms of co-product allocation, most conservative approach is CDR products will take full burden. Where processes are physically separable, processes that do not contribute to CDR can be excluded from the boundary.Where processes are not physically separable, the substitution method may be used to account for avoided emissions associated with the production of a co-product, only if these emissions are deemed *residual* or *hard-to-abate.* If co-product leads to CDR credit, allocation should be done based on carbon mass balance.[[83]](#footnote-82)  *Emissions allocation may be undertaken based on energy content in instances where all co-products, including CDR products, have a measurable energy content*[[84]](#footnote-83) |
| Puro | Other high value products from the process can have emissions attributed through energy allocation. If not deemed high value, all emissions can be attributed to the biochar. Waste inputs can be excluded from the accounting.[[85]](#footnote-84) |
| Verra | No co-product allocation for other products. |
| CAR | For biochar produced alongside other coproducts, an adjustment factor is used, weighing the energy content contained in the biochar over the total energy content in all products (for instance bio-oil).[[86]](#footnote-85) All feedstock sourcing emissions must be accounted for purposely grown biomass (fuels + fertilizer). No emissions allocated for waste biomass feedstock.[[87]](#footnote-86) |
| CSI | Avoided emissions from biomass feedstock burning can be credited for other fugitive emissions from the system, only if it’s proven this was the management practice in the area. Avoided emissions from biomass left to decompose may be credited for other fugitive emissions on a case-by-case basis, where it is reasonably proven biochar is an incentive to avoid uncontrolled biomass decomposition. Fugitive emissions from the system can also be compensated by growing additional biomass (in which case the methane compensation effect needs to be calculated for each specific plant for the first 20 years). Additionally, the fugitive emissions can be compensated with the SPC fraction of the biochar.[[88]](#footnote-87) |

### Table A1-21. BiCRS net removal calculations

| Protocol | Scope |
| --- | --- |
| Isometric | The gross storage adjusted by a permanence factor[[89]](#footnote-88), minus the counterfactual, minus all project emissions (including leakage).[[90]](#footnote-89) |
| Puro | The gross CO2 stored, minus the baseline, minus project emissions, minus leakage emissions.[[91]](#footnote-90) |
| Verra | The gross CO2 stored, plus avoided emissions at the sourcing stage (considered 0), minus all project emissions, minus all leakage emissions.[[92]](#footnote-91) |
| CAR | The gross CO2 stored multiplied by a permanence adjustment factor, minus all project emissions, minus leakage emissions, minus the baseline (assumed to be 0).[[93]](#footnote-92) |
| CSI | The net carbon removed is the gross equivalent removed, minus the methane emissions factor from operating the process, minus the CO2e factor from upstream processes, minus additional transportation emissions for distances greater than 100km, plus any avoided emissions from decomposition/burning, plus the SPC fraction which can be used to compensate fugitive emissions. |

###

### Table A1-22. BiCRS feedstock eligibility

| **Protocol** | **Feedstock Eligibility** |
| --- | --- |
| Isometric | Feedstock must be eligible by avoiding both direct and indirect leakage:  Direct leakage refers to when payments to a supplier directly affect behavior in a way that increases GHG emissions. Indirect refers to when biomass procurement affects market price, leading to land use change or other market shifts. Project proponent must minimize both forms of leakage, based on the criteria below  Market Leakage Eligibility (Both direct and indirect): *1. Project proponent does not pay for feedstock used 2. Project proponent is paid a tipping fee to remove feedstock 3. Project proponent paid for feedstock, but amount paid is lower than cost of harvesting + collection + transport + replacement of feedstock* 4. Same criteria as 3 but through a third party  Eligibility (only indirect): *1. Feedstock is forest residue 2. Feedstock is agricultural waste or animal waste 3. Feedstock is non-marketable waste from an industrial production process*  Eligibility (only direct): *1. Applicable to forest residues or downstream wood wastes only: Biomass originates from a regulated forest management project.*  *2.Applicable to forest residues or downstream wood wastes only: Forest biomass results from forest management activities*[*3*](https://registry.isometric.com/module/biomass-feedstock-accounting/1.2#user-content-fn-3)*in historically stable or increasing forest carbon stocks.*  *3. Applicable to forest residues or downstream wood wastes only: Forest biomass resulting from forest management activities where Sourcing Area carbon stocks may be decreasing, but the forest management activity had to be carried out regardless.*  *4. Applicable to agricultural crop residues only: The purchase contract signed between a Project Proponent and a feedstock supplier commits the Project Proponent to not purchase feedstock from a given acreage in consecutive years. Alternatively, feedstock may be sourced from the same acreage in sequential years if evidence is presented that the acreage has been monocropped (no crop rotation) for at least 5 years.*  *5. Applicable to animal waste feedstocks only: Project Proponent paid a positive amount for their feedstock, but are able to demonstrate there is a surplus of feedstock available in the region.*  To be eligible, feedstock to meet 1 of the first criteria or a combination of 1 and 1 criteria from lists two and three  Recommended sourcing principles: - Historical land use - Tillage practices - Sustainable feedstock harvest[[94]](#footnote-93) |
| Puro | Eligible feedstock must be:  1. Sustainably sourced or waste biomass, including agricultural waste, timber that has been damaged and use of invasive species. It can include MSW, food waste, green waste, animal waste, sludge and biosolids, pulp and paper sludge, agricultural crop waste and landscape conservation management.  2. Dedicated crops are allowed in marginal, degraded or contaminated land or *agricultural land that has been repeatedly cultivated for bioenergy crops (e.g. corn) for more than 20 years prior to the start of the CDR activity.*[[95]](#footnote-94) |
| Verra | Waste biomass and not dedicated crops for CDR. Feedstock would have been left to decay or would have been combusted, with no possibility for energy recovery. If agricultural waste is used, *feedstock removal is limited to no more than 50 percent of total residues to protect against soil degradation*. Sourcing must not lead to increased agricultural activity or decline in carbon stocks (indirect market leakage). If food waste is used, production must not increase because of CDR (indirect leakage). Wood feedstocks must be from forest management activities and not lead to deforestation. Recycling waste is eligible if they comply with thresholds for heavy metal content. Up to 5% of facility input can be high carbon fly ash. Mineral additives to the feedstock are permitted for up to 10 wt%.[[96]](#footnote-95) |
| CAR | Biomass that is a waste stream, byproduct or residue from forest agricultural and other resource management industries is eligible. Feedstock may be urban waste and food waste. Purposely grown crops are eligible under certain conditions. They may be diverted from bioenergy production, but it cannot represent more than 5% of energy production.  If purpose grown, feedstocks must come from marginal lands (Capability Class 5 or 6 delineated by US Department of Agriculture), or reclaimed mining sites. Grown under conditions that cause no ecosystem carbon loss or direct land impacts.[[97]](#footnote-96) |
| CSI | Eligible feedstock is that which originated from the artisan’s farm, including cocoa byproducts, coffee peeling, rice thrashing, sawmills among others. May also be disaster debris and waste from maintenance of fields. Forest residue is allowed as well as food waste and agroforestry waste. Invasive species may be used with a plant to demonstrate the restoration of the organic carbon stored in them.  Biomass may be purposely grown for bamboo and switch grass plantations. However, this excludes forest wood. [[98]](#footnote-97) |

### Table A1-23. BiCRS baseline definitions

| Protocol | Definition |
| --- | --- |
| Isometric | Baseline assumes no activities for the bio-oil/biochar project take place and no infrastructure is built.[[99]](#footnote-98) |
| Puro | Baseline must be established depending on type of facility: new, retrofit or charcoal repurpose. The baseline would be the amount of char previously produced.[[100]](#footnote-99) |
| Verra | *In the absence of the project activity, waste biomass is either left to decay or combusted for purposes other than energy production*. The baseline is set to 0 because the alternative fate could be decomposition.[[101]](#footnote-100) |
| CAR | The baselines are the combustion or natural decomposition of the biomass feedstock. They are assumed to be 0 (as neither of these scenarios happens).[[102]](#footnote-101) |
| CSI | The baseline is considered burning or uncontrolled decomposition of feedstock, which can be credited to offset other emissions in the process.[[103]](#footnote-102) |

### Table A1-24. BiCRS storage durability, permanence, and timing of carbon removals

| Protocol | Definition |
| --- | --- |
| Isometric | Depending on the quantification method, it can result in credits of 200- or 1000-year durability.[[104]](#footnote-103) Mass of organic carbon stored must be adjusted by a *fraction of durable biochar that remains in the soil for the full duration of the crediting timeline*[[105]](#footnote-104) |
| Puro | Permanence of over 200 years.[[106]](#footnote-105) |
| Verra | Over a 100-year time horizon. Permanence factor for this time horizon determined based on pyrolysis temperature.[[107]](#footnote-106) |
| CAR | Permanence in a 100-year timeline. Persistence to be proven by molar ratio of hydrogen/organic carbon of less than 0.7 in line with international biochar Initiative Guidelines.[[108]](#footnote-107) |
| CSI | CO2e of biochar with persistence greater than 1000 years. Determined based on the H/C ratio and assumed 75% of the carbon is Persistent Aromatic Carbon (PAC). The remaining carbon is assumed to be soil organic carbon with a mean residence time of 50 years.[[109]](#footnote-108) |

### Table A1-25. BiCRS additionality requirements (see Glossary for definitions of each additionality type)

| Protocol | Additionality Requirement(s) |
| --- | --- |
| Isometric | Financial, Regulatory, Market adoption and Environmental. |
| Puro | Regulatory and Financial. |
| Verra | Regulatory and Financial. [[110]](#footnote-109) |
| CAR | Financial, Regulatory, and Environmental[[111]](#footnote-110) |
| CSI | Financial [[112]](#footnote-111) |

# 4. Bioenergy with Carbon Capture and Storage (BECCS) Protocols

Tables that do not include a column for data source requirements indicate that the protocols did not specify any recommended or required data sources.

Note: Text in italics are directly taken from the standards/protocols. Footnotes indicate the specific section for each component in the respective protocol.

### Table A1-26. BECCS project siting and construction emissions

| Protocol | Scope | Data source requirement |
| --- | --- | --- |
| Isometric | Equipment and materials manufacture, including all embodied emissions. Construction site emissions, including buildings, infrastructures, and land use change. Emissions associated with feasibility studies. [[113]](#footnote-112) Account for all equipment[[114]](#footnote-113).  *Use cradle-to-grave emission factors*. | None specified |
| Verra | Direct land use change caused by site disturbance/clearing. Emissions associated with erecting the CO2 capture facility as well as any co-located units for CO2 conditioning prior to transport (e.g.: compressor). Emissions from erecting the bioenergy facility are **excluded** (only dedicated CO2 units are accounted for)[[115]](#footnote-114).  Include embodied emissions from BECCS facility only; embodied emissions from bioenergy facilities are excluded.[[116]](#footnote-115) | *Process-based LCA may be conducted with material LCI data from NETL, GREET, Federal LCA Commons Alternatively, estimating data based on purchasing may leverage the US EEIO approach. GREET and NETL have land use change/conversion factors*. [[117]](#footnote-116) |
| Gold Standard | Emissions associated with the erection of the plant, as well as transportation and storage facilities, including any land use change emissions and soil organic carbon loss in land used for project[[118]](#footnote-117).  Embodied emissions of materials used for construction of capture and storage facilities are **excluded**[[119]](#footnote-118). | *Life-cycle methods in accordance with host country or jurisdictional standards or, if unavailable, international standards (e.g. ISO, IEC)* [[120]](#footnote-119).GREET, IPCC Guidelines or a National source for land use change[[121]](#footnote-120) |

### Table A1-27. BECCS transportation emissions

| Protocol | Scope | Data source requirement |
| --- | --- | --- |
| Isometric | Transport of biomass feedstock and transport of compressed or liquid CO2[[122]](#footnote-121) . *Include all emissions associated with the fuel-cycle such as direct combustion of fuel as well as indirect upstream emissions, including production and distribution of fuel or electricity.*  *Embodied life cycle emission factors must be used for vehicles and infrastructure produced, constructed, and utilized for the CO2 removal project, and this must be calculated in addition to the Energy Usage or Distance-Based Methods*.[[123]](#footnote-122) | Can be calculated using energy usage or distance-based methods.[[124]](#footnote-123) |
| Verra | Emissions associated with transporting the biomass feedstock to the facility, as well transporting capture materials.[[125]](#footnote-124) | *Default emission factor to transport biomass cargo by different modes (ship, truck, or rail), using CO2 transport emission factors as a proxy (DEFr from Section 6 of VMD0057) (g CO2/t-km)*[[126]](#footnote-125) |
| Gold Standard | Transporting biomass and biomass residues to the facility and transporting all consumables and ancillary equipment into the facility[[127]](#footnote-126). | Use values from CDM TOOL12 for transportation of freight |

### Table A1-28. BECCS energy (electricity and fuel) use emissions

| Protocol | Scope | Data source requirement | Miscellaneous |
| --- | --- | --- | --- |
| Isometric | *The emissions associated with energy use must account for all operations that consume energy within the CDR project processes, through the usage of both electricity and fuel*.  Electricity emission factors represent the life cycle of the fuel used to generate electricity and of the generator. [[128]](#footnote-127) | If project is grid powered, use *DOE National Transmission Needs Study* emission factor for grid electricity.  No specific emission factor source is required for projects with PPA, but factors must include generator and fuel. [[129]](#footnote-128) | Differentiates accounting for facilities consuming under (non-intensive) and over 200 GWh (intensive).  Annual volumetric matching for non-intensive facilities, hourly volumetric for intensive.  Waste heat can be used as a burden free energy input.[[130]](#footnote-129) |
| Verra | Emissions for all electricity and fuels consumed, including upstream emissions from generation. Account for grid electricity separately to dedicated electricity and heat generation. Waste heat can be used, carrying a burden of 0 emissions.[[131]](#footnote-130) | An emission factor for the emission of each GHG (CO2, CH4, N2O) for each fuel type.[[132]](#footnote-131)  Electricity emission factors outlined in VT0011 Electricity System Emission Factors. |  |
| Gold Standard | Account for electricity and fuel use both onsite and offsite[[133]](#footnote-132). | GREET, a national inventory, or another equivalent life-cycle method. For fuel use, calculate emissions with a well-to-tank or well-to-meter factor[[134]](#footnote-133). |  |

### Table A1-29. BECCS operation and direct emissions.

| Protocol | Scope | Data source requirement |
| --- | --- | --- |
| Isometric | Biomass feedstock sourcing, use of consumables including embodied emissions. Waste processing and disposal. Surveys and emissions associated with sampling for MMRV. Maintenance of project site including refurbishments and replacement. [[135]](#footnote-134) Other scope 3 emissions such as staff travel. |  |
| Verra | Ongoing emissions associated with the supply of consumables such as chemicals and water. Other emissions associated with maintenance and operation.  To include upstream emissions of biomass consumed and upstream emissions of capture materials. Emissions from cultivating and processing biomass needs to be accounted for. Include methane emission for *fugitive and venting emissions from on-site fuel use*[[136]](#footnote-135) | *Highly dependent on the chemical – some data are available from NETL, GREET, and US LCI Alternatively, estimating data based on purchasing may leverage the US EEIO approach*[[137]](#footnote-136). |
| Gold Standard | Emissions from sourcing biomass, including all processing. Emissions from the fermentation process, including any venting. Emissions from the capture process, compression, transportation and injection. Embodied emissions of consumables need to be included, such as emissions from sorbent production.  Emissions associated with transporting CO2 from capture to injection site.  Fugitive emissions at injection sites need to be quantified, as well as emissions from the subsurface to the atmosphere. All emissions resulting from land management, depending on whether it’s grassland or cropland. All emissions associated with soil fertilization and amendment as well as emissions from seeding and harvesting the feedstock[[138]](#footnote-137). |  |

### Table A1-30. BECCS end-of-life emissions

| Protocol | Scope |
| --- | --- |
| Isometric | End of life of the project facility and emissions associated with ongoing MMRV sampling activities. [[139]](#footnote-138) |
| Verra | Emissions associated with deconstruction, waste disposal and materials recycling[[140]](#footnote-139). |
| Gold Standard | Emissions associated with decommissioning of facilities are excluded [[141]](#footnote-140). |

### Table A1-31. BECCS counterfactuals

| Protocol | Scope | Approach |
| --- | --- | --- |
| Isometric | Counterfactual Storage: CO2 that would have been permanently stored in the biomass in the absence of the CDR project. Known as ineligible biomass. Biomass, whose counterfactual fate is being released in the next 15 years is eligible biomass. [[142]](#footnote-141) | *If the counterfactual fate of the biomass includes the stored biogenic C being emitted as GHGs with a GWP100>1, the total biomass eligible is equal to the minimum of:*  *(1) the CO2e (evaluated at GWP100) of counterfactually released GHGs emitted within 15 years*  *(2) the total stored CO2 in the biomass minus the CO2 in biomass that would not have counterfactually been released within 50 years.*    *Landfilled wood is not an eligible feedstock, unless the Project Proponent can demonstrate the counterfactual fate would release all stored biogenic carbon within 15 years.*  *Feedstocks that are sourced through government managed or funded wildfire mitigation or restoration activities will be assigned a counterfactual storage value of 0.*  *Applicable to non-forestry feedstocks: The biomass feedstock was not grown for the purposes of energy production and does not have a likely counterfactual energy production use.*[[143]](#footnote-142) |
| Verra | No counterfactual storage considered. [[144]](#footnote-143) | Not applicable. |
| Gold Standard | No counterfactual storage considered. | Not applicable. |

### Table A1-32. BECCS economic leakage (market-mediated impacts)

| Protocol | Scope | Approach |
| --- | --- | --- |
| Isometric | For biomass projects, replacement emissions (to compensate for biomass that was serving another purpose) are the minimum leakage. Projects that would lead to ecological leakage associated with land use change are ineligible. [[145]](#footnote-144) | Replacement emissions: The addition of replacement emissions associated with energy, embodiment and transportation of new feedstock serving a market need that the CDR project could be displacing. Cases where replacement emissions are exempt are the following:  *If the feedstock currently serves no purpose, such as mill residues in a stockpile or forest residues sitting on the forest floor, there are deemed to be no replacement emissions.*  *For project feedstock usage above the percentage of what is theoretically possible to use for a given purpose (the ‘Sustainable Use Rate’) the feedstock would be considered true waste and therefore not require calculation of replacement emissions.*  For environmental services replacement emissions, the mass of replacement can be used to calculate the emissions. For example, the fertilizer capacity from feedstock that needs to be replaced can be calculated by sampling the amount of nitrogen, phosphorus and potassium in each batch. The counterfactual scenario must account for replacing the same amount of NPK. [[146]](#footnote-145) |
| Verra | Leakage from increased harvesting of biomass needs to be accounted for. If biomass is eligible under criteria, market leakage is 0. For ineligible biomass, market leakage needs to be accounted for based on the mass diverted from an alternative use. [[147]](#footnote-146) | *Use an embodied emissions factor, determined through a life cycle assessment (LCA), in Equation (10) to calculate leakage emissions from cultivation.* Otherwise, use total area to harvest additional feedstock and values provided in CDM TOOL16 to calculate leakage from cultivation. For market leakage, assume the most likely alternative scenario for biomass and use values in CDM TOOL16.[[148]](#footnote-147) |
| Gold Standard | Leakage emissions from diverting biomass from other activities, as well as diverting other economic activities to purposefully grow biomass. No leakage is considered if land was abandoned or had the same level of other economic activity (e.g.: cattle) and no settlements were displaced from the area within the project boundary. For dedicated biomass: if the project is considered large scale, no activity shifting is allowed. If the project is considered small scale, leakage is considered 0 if shifting is under 10%. If leakage is higher than 10% and smaller than 50%, a value of 15% of the difference between baseline emissions and project emissions is used.  For biomass residues: no leakage considered if residues are dumped to decay in a field, dumped in a landfill, or the waste is burned in an uncontrolled manner. If waste biomass was used for energy production, other applications or its end use cannot be determined, leakage must be established. Leakage is calculated using the energy value of the waste feedstock and assuming all this energy needs to be replaced with the most carbon intensive fossil fuel.  If the facility shows to have increased the quantity of biomass produced in the region, compared to a previous 3 year average, leakage due to increased production needs to be accounted for[[149]](#footnote-148).  Loss of soil organic carbon due to the diversion of the feedstock needs to be accounted for, depending on climate region and soil type, only if distributed area is over 10% of the soil stratum[[150]](#footnote-149). | Leakage due to increase in production needs to be accounted for using a suitable method which is ISO14044 compliant for the mass of increased biomass consumed. Use values provided by CDM TOOL16[[151]](#footnote-150). |

### Table A1-33. BECCS multifunctionality

| Protocol | Scope |
| --- | --- |
| Isometric | *In cases where the project has demonstrated that the co-product facility is non-additional, universal equipment may be excluded from the system boundary.*[[152]](#footnote-151) Emissions avoided by the BECCS project, such as providing a secondary source of low carbon electricity, avoiding landfill emissions and reducing waste transport emissions **are not credited.** [[153]](#footnote-152)  In terms of co-product allocation, in the most conservative approach, CDR products will take full burden. Where processes are physically separable, processes that do not contribute to CDR can be excluded from the boundary.Where processes are not physically separable, the substitution method may be used to account for avoided emissions associated with the production of a co-product, only if these emissions are deemed *residual* or *hard-to-abate.* If co-product leads to CDR credit, allocation should be done based on carbon mass balance.[[154]](#footnote-153) |
| Verra | Emissions from the bioenergy facility alone are excluded from the project boundary. |
| Gold Standard | The CO2 stream is classified into project and non-project streams. The project stream contains CO2 from fermented biomass from a renewable feedstock. Non-project streams would be CO2 capture from fermented biomass from ineligible sources and CO2 captured from post-combustion.[[155]](#footnote-154) |

**Table A60 BECCS net removal calculation**

| Protocol | Calculation |
| --- | --- |
| Isometric | Gross removal, minus counterfactual, minus all project emissions.[[156]](#footnote-155) |
| Verra | Net CO2 transported to storage, minus all project emissions, minus any leakage.[[157]](#footnote-156) |
| Gold Standard | Net removed amount is project stream, minus all project emissions, minus leakage, minus baseline.[[158]](#footnote-157) |

**Table B61 BECCS feedstock eligibility requirements**

| Protocol | Feedstock Eligibility |
| --- | --- |
| Isometric | Feedstock must be eligible by avoiding both direct and indirect leakage:  Direct leakage refers to when payments to a supplier directly affects behavior in a way that increases GHG emissions. Indirect refers to when biomass procurement affects market price, leading to land use change or other market shifts. Project proponent must minimize both forms of leakage, based on the criteria below  Market Leakage Eligibility (Both direct and indirect): *1. Project proponent does not pay for feedstock used 2. Project proponent is paid a tipping fee to remove feedstock 3. Project proponent paid for feedstock, but amount paid is lower than cost of harvesting + collection + transport + replacement of feedstock* 4. Same criteria as 3 but through a third party  Eligibility (only indirect): *1. Feedstock is forest residue 2. Feedstock is agricultural waste or animal waste 3. Feedstock is non-marketable waste from an industrial production process*  Eligibility (only direct): *1. Applicable to forest residues or downstream wood wastes only: Biomass originates from a regulated forest management project.*  *2.Applicable to forest residues or downstream wood wastes only: Forest biomass results from forest management activities in historically stable or increasing forest carbon stocks.*  *3. Applicable to forest residues or downstream wood wastes only: Forest biomass resulting from forest management activities where Sourcing Area carbon stocks may be decreasing, but the forest management activity had to be carried out regardless.*  *4. Applicable to agricultural crop residues only: The purchase contract signed between a Project Proponent and a feedstock supplier commits the Project Proponent to not purchase feedstock from a given acreage in consecutive years. Alternatively, feedstock may be sourced from the same acreage in sequential years if evidence is presented that the acreage has been monocropped (no crop rotation) for at least 5 years.*  *5. Applicable to animal waste feedstocks only: Project Proponent paid a positive amount for their feedstock, but are able to demonstrate there is a surplus of feedstock available in the region.*  To be eligible, feedstock to meet 1 of the first criteria or a combination of 1 and 1 criteria from lists two and three  Recommended sourcing principles: - Historical land use - Tillage practices - Sustainable feedstock harvest[[159]](#footnote-158) |
| Verra | Eligible biomass is waste biomass, including primary or secondary processing, food waste, sludge, manure, bagasse, MSW, tertiary wood waste, lignin, invasive species management waste, park management activities and wildfire management activities. Feedstock may be forestry wastes and may be a dedicated crop if grown under a regulatory program or under a sustainability certification. *The biomass must not be produced from a converted ecosystem such as where forest or wetland has been converted to agriculture/cropland 10 years or more before the start of the project*[[160]](#footnote-159). |
| Gold Standard | Demonstrated renewable biomass. Renewable biomass can be: • Purposely grown crops from forests, woody biomass or non-woody biomass, if the management practices put in place, ensure that the level of carbon stocks does not decrease in activity area.  • Waste biomass, where disposing of the waste does not affect the area’s carbon pools. • Non-fossil fraction of industrial or municipal solid waste.  • The land where biomass is cultivated cannot contain wetlands or be subjected to flood irrigation or be organic soil (10 cm or more of thickness and 20% by organic carbon weight or a lower percentage for soils subject to water saturation that contain clay).  • For waste biomass, the proponent must demonstrate supply is currently at least 25% larger than current demand feedstock in the region.[[161]](#footnote-160) |

**Table A62 BECCS baseline definitions**

| Protocol | Baseline definition |
| --- | --- |
| Isometric | *New-build: The baseline scenario assumes that all activities associated with the Bio-CCS Project and the wider facility do not take place and no associated infrastructure is built.*  *Retrofit: The baseline scenario assumes that the activities associated with the Bio-CCS component of the wider facility do not take place and no additional infrastructure associated with CCS is built.*[[162]](#footnote-161) |
| Verra | The baseline is the bioenergy project in the absence of a CO2 capture process. Or, if an existing capture unit is in place, the baseline is the current capture capacity (compared to an expanded extension).[[163]](#footnote-162) |
| Gold Standard | Alternative scenarios need to be defined by project proponent. The scenario with the least emissions is considered the baseline[[164]](#footnote-163). |

**Table A63 BECCS storage durability, permanence, and timing of carbon removals.**

| Protocol | Durability requirements |
| --- | --- |
| Isometric | >1000 years[[165]](#footnote-164) |
| Verra | Not defined |
| Gold Standard | Not defined |

**Table A64 BECCS additionality requirements**

| Protocol | Additionality requirements |
| --- | --- |
| Isometric | Financial, Regulatory, Market Adoption and Environmental. [[166]](#footnote-165) |
| Verra | Regulatory and Financial. [[167]](#footnote-166) |
| Gold Standard | Regulatory and Financial[[168]](#footnote-167) |

# 5. Land-Based Mineralization Protocols

The protocols reviewed under mineralization cover a broad range of technologies including ex-situ mineralization in quarries and industrial sites (Isometric), carbonated materials (Puro), CO2 utilization in concrete (Verra) and carbonation of reactive mineral wastes (Gold Standard). This diversity reflects the wide technological landscape for mineralization and the challenge of creating harmonized accounting for different system configurations.

Tables that do not include a column for data source requirements indicate that the protocols did not specify any recommended or required data sources.

Note: Text in italics are directly taken from the standards/protocols. Footnotes indicate the specific section for each component in the respective protocol.

### Table A1-34. Mineralization project siting and construction emissions

| Protocol | Scope | Data source requirement |
| --- | --- | --- |
| Isometric (ex-situ mineralization in quarries and industrial sites) | Project establishment emissions from the *point of project inception through after the operations have taken place.*[[169]](#footnote-168)  Emissions associated with:  Equipment and materials transport to site.  Construction and installation.  Initial surveys and feasibility studies.  Raw materials and equipment used in the fabrication, assembly and construction of machinery utilized for spreading, tilling, churning, feedstock manipulation and sampling.  *Use cradle-to-grave emission factors*[[170]](#footnote-169) for all equipment.  Include *land use change as a result of project establishment*[[171]](#footnote-170) | None specified |
| Puro (carbonated materials) | Cradle-to-gate emissions of:  Erecting the carbonation facility.  System boundaries include emissions from production and supply of all materials.[[172]](#footnote-171)  *Follow the ISO 14040 standard*. | None specified |
| Verra (CO2 utilization in concrete) | Embodied emissions for equipment, facilities, and infrastructure in:  The CO2 source plant (for example the DAC plant).  The cement production plant.  The concrete production plant where cement is reacted with CO2.[[173]](#footnote-172) | None specified |
| Gold Standard (carbonation of reactive mineral wastes) | Embodied emissions for:  Additional processing of mineral waste.  Constructing new infrastructure.[[174]](#footnote-173) | Use facility lifetime of 20 years for infrastructure establishment and embodied emissions.  *Default factors for Neustark carbonation plants over a facility lifetime of 20 years are given in Section 5.7.(h), Parameter ID 11.*[[175]](#footnote-174) |

### Table A1-35. Mineralization transportation emissions

| Protocol | Scope | Data source requirement |
| --- | --- | --- |
| Isometric (ex-situ mineralization in quarries and industrial sites) | *Transportation of:*  *Feedstock to the Project location (where applicable). Rock from quarry to crushing site.*  *Transportation and shipping related to collecting samples for environmental monitoring.[[176]](#footnote-175)*  *Include all emissions associated with the fuel-cycle such as direct combustion of fuel as well as indirect upstream emissions, including production and distribution of fuel or electricity.*  *Embodied life cycle emission factors must be used for vehicles and infrastructure produced, constructed, and utilized for the CO2 removal project, and this must be calculated in addition to the Energy Usage or Distance-Based Methods.*[[177]](#footnote-176),[[178]](#footnote-177) | None specified |
| Puro (carbonated materials) | Transportation of:  Raw materials from their point of production to the plant.  *The system boundary excludes the distribution of the material, the use phase and the end-of-life of the material.*[[179]](#footnote-178) | None specified |
| Verra (CO2 utilization in concrete) | Transportation of:  CO2 to the facility.  Cement to the facility.  Produced concrete to the end user. | Emissions factor provided per tonne-mile for different transport modes[[180]](#footnote-179) |
| Gold Standard (carbonation of reactive mineral wastes) | Transportation of:  CO2 to the carbonation plant.  Emissions for transporting the mineral feedstock, as well as mobile equipment and consumables to the plant must be included only if they *are deemed significant*.  If no additional transportation of mineral feedstock is required relative to the baseline, mineral feedstock transportation emissions are set to 0.[[181]](#footnote-180) | Use values for freight or transport from CDM Tool 12 or Gold standard Tool 02 |

### Table A1-36. Mineralization energy (electricity and fuel) use emissions

| Protocol | Scope | Data source requirements | Miscellaneous |
| --- | --- | --- | --- |
| Isometric (ex-situ mineralization in quarries and industrial sites) | *The emissions associated with energy use must account for all operations that consume energy within the CDR project processes, through the usage of both electricity and fuel*.  Electricity emission factors represent the life cycle of the fuel used to generate electricity and of the generator.[[182]](#footnote-181) | If the project is grid powered, use *DOE National Transmission Needs Study* emission factor for grid electricity.  No specific emission factor source is required for projects with PPA, but factors must include generation and fuel. [[183]](#footnote-182) | Different accounting methods are required for *non-intensive* facilities consuming less than 200 GWh annually, which can use annual volumetric matching, and *intensive* facilities consuming more than 200 GWh annually, which must use hourly volumetric matching.  Waste heat can be used as a burden free energy input.[[184]](#footnote-183) |
| Puro (carbonated materials) | Energy inputs for all processes involved, including manufacturing, use and disposal[[185]](#footnote-184). Must use an emission factor that accounts for the whole generation life cycle. | None specified |  |
| Verra (CO2 utilization in concrete) | All electricity and fuel used for CO2 sourcing, including capture, compression, and transport.  For cement and concrete production, only account for incremental electricity and fuel used relative to the baseline activity (manufacturing precast concrete). [[186]](#footnote-185),[[187]](#footnote-186) | *Use a grid emission factor published by a government agency.*  *Where grid emission factors are not available from a government agency, an emission factor published by another reputable and recognized source, and reviewed for publication by an appropriate qualified, independent organization or appropriate peer review group may be used.*[[188]](#footnote-187) |  |
| Gold Standard (carbonation of reactive mineral wastes) | Account for energy and fuel use both onsite and offsite.[[189]](#footnote-188) | A grid emission factor published by a government or national agency. Alternatively, use CDM Tool 07 to calculate emissions for grid electricity. [[190]](#footnote-189)  For fuel, use emission factors from the commercial supplier. Alternatively, use chemical composition method or net calorific value method to calculate emission factors.[[191]](#footnote-190) |  |

### Table A1-37. Mineralization operational and direct emissions

| Protocol | Scope |
| --- | --- |
| Isometric (ex-situ mineralization in quarries and industrial sites) | Direct emissions from quarrying, crushing and grinding, sampling and analysis.  Direct emissions from other miscellaneous activities such as staff transport.  *Life cycle emissions of consumables and water.* |
| Puro (carbonated materials) | Direct emissions from CO2 and mineral feedstock sourcing and operating the carbonation process.  *The system boundary excludes the distribution of the material, the use phase and the end-of-life of the material.*[[192]](#footnote-191) |
| Verra (CO2 utilization in concrete) | Direct emissions from producing the cement, including calcination, from the CO2 capture process, and from operating the concrete production process. [[193]](#footnote-192)  CO2 supplied that is lost and not mineralized must be considered a project emission. |
| Gold Standard (carbonation of reactive mineral wastes) | Direct emissions from CO2 capture and processing, liquefaction, refrigeration, and the operation of the carbonation process.  Must include any CO2 evaporation and physical leakages.[[194]](#footnote-193) |

### Table A1-38. Mineralization end-of-life emissions

| Protocol | Scope |
| --- | --- |
| Isometric (ex-situ mineralization in quarries and industrial sites) | *Anticipated emissions:*  *closure of storage sites, including embodied emissions associated with equipment and materials manufacture, transport of equipment and materials to site and emissions associated with energy use and consumables use for closure operations including installation and groundworks, as well as waste processing activities and emissions associated with land use change.*[[195]](#footnote-194) |
| Puro (carbonated materials) | The system boundary must include disposal of waste associated with all processes.[[196]](#footnote-195) |
| Verra (CO2 utilization in concrete) | Not mentioned. |
| Gold Standard (carbonation of reactive mineral wastes) | Emissions associated with decommissioning of facilities are excluded.[[197]](#footnote-196) |

### Table A1-39. Mineralization counterfactuals

| Protocol | Scope | Data Requirements | Miscellaneous |
| --- | --- | --- | --- |
| Isometric (ex-situ mineralization in quarries and industrial sites) | *Carbon removal which would have occurred in the absence of removal activities.*[[198]](#footnote-197) | Counterfactual carbonation is quantified using samples collected from a subset of the project area. Geochemical models can be used to validate empirical measurements of feedstock.[[199]](#footnote-198) To quantify the counterfactual, an adjusted version of the Steinour equation, which uses bulk elemental oxide composition to estimate the maximum CO2 removal potential is used. |  |
| Puro (carbonated materials) | *The amount of CO2 that the feedstock material would have sequestered naturally (in the absence of project activities) in 50 years following the commencement of the accelerated carbonation activity.*[[200]](#footnote-199) | Estimate based on mineralogy, physical form and likely storage conditions. Average sequestration rates may be used. [[201]](#footnote-200) | *Projects, where the baseline sequestration amount is estimated to be 50 % or more of the total amount sequestered are not eligible to be credited under the Carbonated Materials methodology*. |
| Verra (CO2 utilization in concrete) | The amount of CO2 that would have naturally been stored in the concrete must be deducted as a penalty. Avoided emissions from reducing cement mass demand compared to the baseline are credited.[[202]](#footnote-201) | Carbon content in cement of both the baseline and the project sample can be measured using a carbon analyzer and then subtracted to yield the additional CO2 removals. Alternatively, a default value of 60% mineralization from the injected CO2 can be used for both the baseline and the project samples.[[203]](#footnote-202) |  |
| Gold Standard (carbonation of reactive mineral wastes) | Natural removals due to carbonation need to be accounted for as a penalty if they represent >2% of project sink capacity. [[204]](#footnote-203) | Natural carbonation to be determined by using material composition, morphology and expected environmental conditions such as temperature, precipitation and groundwater pH[[205]](#footnote-204) |  |

### Table A1-40. Mineralization economic leakage (market-mediated impacts)

| Protocol | Scope |
| --- | --- |
| Isometric (ex-situ mineralization in quarries and industrial sites) | Include increases in GHG emissions associated with the Project shifting emissions or causing a knock-on effect that increases emissions elsewhere.[[206]](#footnote-205)  *This includes emissions associated with activity-shifting, market leakage and ecological leakage*. |
| Puro (carbonated materials) | Not mentioned. |
| Verra (CO2 utilization in concrete) | Not mentioned. |
| Gold Standard (carbonation of reactive mineral wastes) | Leakage is 0 provided the feedstock has no baseline market or use.  Market shift emissions associated with having to replace the mineral feedstock must be included if the feedstock has a baseline market or use.  Additionally, leakage emissions may arise from an increase in biogenic CO2 production if the feedstock is sourced from a new facility; these leakage emissions must be included. [[207]](#footnote-206) |

### Table A1-41. Mineralization multifunctionality

| Protocol | Requirements |
| --- | --- |
| Isometric (ex-situ mineralization in quarries and industrial sites) | In terms of co-product allocation, in the most conservative approach, CDR products will take full burden. Where processes are physically separable, processes that do not contribute to CDR can be excluded from the boundary.Where processes are not physically separable, the substitution method may be used to account for avoided emissions associated with the production of a co-product, only if these emissions are deemed *residual* or *hard-to-abate.* If co-product leads to CDR credit, allocation should be done based on carbon mass balance.[[208]](#footnote-207)  Waste inputs are treated as burden-free. |
| Puro (carbonated materials) | *An allocation of the production burdens can be made between the co-products[[209]](#footnote-208). The burdens from production of e.g. waste feedstock material can be excluded from the system boundary, but the supply and handling of the waste feedstock material must be included[[210]](#footnote-209).* |
| Verra (CO2 utilization in concrete) | Not specified. |
| Gold Standard (carbonation of reactive mineral wastes) | Not specified. |

### Table A1-42. Mineralization net removal calculation

| Protocol | Scope | Data source requirement |
| --- | --- | --- |
| Isometric (ex-situ mineralization in quarries and industrial sites) | The gross storage, minus the counterfactual, minus all project emissions (including leakage).[[211]](#footnote-210) |  |
| Puro (carbonated materials) | The amount of CO2 stored, minus the emissions of the production process, minus the amount stored in the baseline (counterfactual).[[212]](#footnote-211) | The stored amount is a product of the total amount of carbonated material times the amount of CO2 reacted per kg of material, determined via lab measurements. |
| Verra (CO2 utilization in concrete) | The net-removed CO2 is equal to the gross removals, minus a factor composed of: the gross removal divided by the gross removal, minus the project emissions, plus the counterfactual, all of this multiplied by the incremental electricity and fuel emissions compared to the project baseline, plus the emissions associated with the capture, transport and compression of CO2, plus the reversals.[[213]](#footnote-212) |  |
| Gold Standard (carbonation of reactive mineral wastes) | Net removed amount is gross sinks, minus project emissions, minus leakage emissions, minus baseline (counterfactual) removals. [[214]](#footnote-213) | Gross amount captured may be calculated via ex-ante quantification, through the mass of mineral feedstock and the sink factor per unit mass. Or it may be quantified via ex-post quantification, using the difference of mass of CO2 in and out of the reactor. [[215]](#footnote-214) |

### Table A1-43. Mineralization feedstock eligibility requirements

| Standard | Feedstock Eligibility Requirements |
| --- | --- |
| Isometric (ex-situ mineralization in quarries and industrial sites) | No feedstock from carbonate sources is permitted. Feedstocks from mining waste can be used but might require further characterization to comply with local regulations. Homogeneity within a batch needs to be proved through characterization.[[216]](#footnote-215) |
| Puro (carbonated materials) | Both waste and purpose-produced feedstock are permitted. [[217]](#footnote-216). |
| Verra (CO2 utilization in concrete) | *For removals, the project proponent must provide clear and transparent evidence that the source is a DAC or biogenic CO2 facility.*[[218]](#footnote-217) Other materials can be dedicated feedstocks for the manufacture of concrete. |
| Gold Standard (carbonation of reactive mineral wastes) | Only waste feedstock, proven to have no alternative use, before it enters a downstream process or it is landfilled.  CO2 sources from atmospheric removal or biogenic sources are eligible.[[219]](#footnote-218) |

### Table A1-44. Mineralization baseline definitions

| Standard | Baselines |
| --- | --- |
| Isometric (ex-situ mineralization in quarries and industrial sites) | *Establishment of Baseline based on business-as-usual industrial practices occurs.* [[220]](#footnote-219) |
| Puro (carbonated materials) | The counterfactual can be ignored in cases where natural sequestration would have been ≤1% of total amount sequestered. [[221]](#footnote-220) |
| Verra (CO2 utilization in concrete) | The baseline is pre-cast concrete made through traditional processes. [[222]](#footnote-221) |
| Gold Standard (carbonation of reactive mineral wastes) | Alternative scenarios need to be defined by the project proponent. The scenario with the least emissions is considered the baseline. [[223]](#footnote-222) |

### Table A1-45. Mineralization storage durability, permanence, and timing of carbon removals.

| Standard | Durability and Permanence |
| --- | --- |
| Isometric (ex-situ mineralization in quarries and industrial sites) | 1000+ years[[224]](#footnote-223) |
| Puro (carbonated materials) | 100 years[[225]](#footnote-224). |
| Verra (CO2 utilization in concrete) | Not addressed |
| Gold Standard (carbonation of reactive mineral wastes) | 1000+ years. Carbonated products *shall not be subject to conditions that could impact its durability*. Should not be used for agricultural soils, clinker production, ceramics, or high temperature processes. If used as aggregate for building materials, resulting materials must fulfill standards. [[226]](#footnote-225) |

### Table A1-46. Mineralization additionality requirements

| Standard | Additionality requirements |
| --- | --- |
| Isometric (ex-situ mineralization in quarries and industrial sites) | Financial, Regulatory, Market Adoption and Environmental. [[227]](#footnote-226) |
| Puro (carbonated materials) | Regulatory and financial. |
| Verra (CO2 utilization in concrete) | Regulatory and Financial. [[228]](#footnote-227) |
| Gold Standard (carbonation of reactive mineral wastes) | Financial, Regulatory and Market Adoption. [[229]](#footnote-228) |

# 6. Enhanced Rock Weathering (ERW) protocols

Tables that do not include a column for data source requirements indicate that the protocols did not specify any recommended or required data sources.

Note: Text in italics are directly taken from the standards/protocols. Footnotes indicate the specific section for each component in the respective protocol.

### Table A1-47. ERW project siting and construction emissions

| Protocol | Scope |
| --- | --- |
| Isometric | Emissions associated with all quarrying activities; crushing and grinding, feedstock characterization and emissions for spreading at agricultural application site. Must include embodied emissions of all equipment[[230]](#footnote-229). |
| Puro | Emissions associated with the establishment of terrestrial storage site; construction works, terracing, fencing, building, soil disturbance (land use change emissions)[[231]](#footnote-230). |

### Table A1-48. ERW transportation emissions

| Protocol | Scope | Data source requirement |
| --- | --- | --- |
| Isometric | Emissions from transportation of feedstock to agricultural site; transportation of rock from quarry to crushing site; and transportation and shipping related to collecting samples for environmental monitoring[[232]](#footnote-231). *Include all emissions associated with the fuel-cycle such as direct combustion of fuel as well as indirect upstream emissions, including production and distribution of fuel or electricity*.  Embodied life cycle emission factors must be used for vehicles and infrastructure produced, constructed, and utilized for the CO2 removal project, and this must be calculated in addition to the Energy Usage or Distance-Based Methods.[[233]](#footnote-232) | Can be calculated using energy usage or distance-based methods.[[234]](#footnote-233) |
| Puro | Emissions from transporting ground material to its application site, including loading, transportation, and unloading, and all operations until the processed material is ready for application at the site[[235]](#footnote-234). | LCI data which is ISO 14040/44 compliant. |

###

### Table A1-49. ERW energy (electricity and fuel) use emissions

| Protocol | Scope | Data source requirement | Miscellaneous |
| --- | --- | --- | --- |
| Isometric | *The emissions associated with energy use must account for all operations that consume energy within the CDR project processes, through the usage of both electricity and fuel.*  Electricity emission factors represent the life cycle of the fuel used to generate electricity and of the generator. [[236]](#footnote-235) | If the project is grid powered, use *DOE National Transmission Needs Study* emission factor for grid electricity.  No specific emission factor source is required for projects with PPA, but factors must include generation and fuel.[[237]](#footnote-236) | Differentiates accounting for facilities consuming under (non-intensive) and over 200 GWh (intensive).  Annual volumetric matching for non-intensive facilities, hourly volumetric for intensive.  Waste heat can be used as a burden free energy input. [[238]](#footnote-237) |
| Puro | Emissions from energy use for operations such as rock mining, grinding, transport and spreading. Must include emissions from production, installation, maintenance and disposal of generator[[239]](#footnote-238). | None specified. |  |

### Table A1-50. ERW operation and direct emissions

| Protocol | Scope |
| --- | --- |
| Isometric | Emissions from sampling and analysis activities[[240]](#footnote-239). Must account for inorganic carbon loss due to soil column processes. |
| Puro | Emissions from mining of rock for ERW activity, processing of material, and all operations in the application stage[[241]](#footnote-240). Must account for all losses due to subsequent chemical reactions in the environment[[242]](#footnote-241) |

### Table A1-51. ERW end-of-life emissions

| Protocol | Scope |
| --- | --- |
| Isometric | Emissions associated with equipment or infrastructure deconstruction[[243]](#footnote-242). |
| Puro | Not included. |

### Table A1-52. ERW counterfactuals

| Protocol | Scope | Data source requirement |
| --- | --- | --- |
| Isometric | To be measured with a control plot. The counterfactual is the CO2 removal that would have occurred from agricultural limiting in the absence of project activities. In some cases, the counterfactual of the feedstock is also relevant, that is the amount that would have been stored at the surface of the rock without intervention[[244]](#footnote-243). | Calculated with a combination of direct measurements and models. |
| Puro | Weathering in a non-application plot[[245]](#footnote-244). | Can be measured with plant cation uptake of the control plot[[246]](#footnote-245). |

### Table A1-53. ERW economic leakage (market-mediated impacts)

| Protocol | Scope |
| --- | --- |
| Isometric | Market leakage needs to be assessed, as a minimum feedstock replacement emissions need to be accounted for[[247]](#footnote-246). |
| Puro | *May occur, primarily, if the weathering material (whether a primary product or a burden-free co-product) was already used to deliver another product or service, and thereby possibly entail the extraction of additional primary material, if demand persists*[[248]](#footnote-247). |

### Table A1-54. ERW multifunctionality

| Protocol | Scope |
| --- | --- |
| Isometric | In terms of co-product allocation, in the most conservative approach, CDR products will take full burden. Where processes are physically separable, processes that do not contribute to CDR can be excluded from the boundary.Where processes are not physically separable, the substitution method may be used to account for avoided emissions associated with the production of a co-product, only if these emissions are deemed *residual* or *hard-to-abate.* If co-product leads to CDR credit, allocation should be done based on carbon mass balance.[[249]](#footnote-248) |
| Puro | *The two possible approaches for solving a multi-functionality issue, in the context of CORCs, are i) allocation of burdens between the co-products, and ii) cut-off approach (i.e. neglecting the co-products). The second approach is deemed more conservative and is simpler to implement*[[250]](#footnote-249). |

### Table A1-55. ERW Net Removal Calculation

| Protocol | Scope |
| --- | --- |
| Isometric | The gross CO2 stored, minus the counterfactual, minus all project emissions, including losses[[251]](#footnote-250). |
| Puro | The gross CO2 stored, minus the emissions from the project, minus the leakage, minus the soil carbon loss[[252]](#footnote-251). |

### Table A1-56. ERW feedstock eligibility

| Protocol | Feedstock Eligibility |
| --- | --- |
| Isometric | No feedstock from carbonate sources is permitted. Feedstocks from mining waste can be used but might require further characterization to comply with local regulations. Homogeneity within a batch needs to be proved through characterization.[[253]](#footnote-252) |
| Puro | Weathering materials with limited concentration of heavy metals. A geochemical assay must be conducted at least once per every 5000t of weathering material and *shall at least encompass* the particle size distribution, chemical oxide composition, Mineralogy and minor and major chemical elements. [[254]](#footnote-253). |

### Table A1-57. ERW baseline definitions

| Protocol | Baselines |
| --- | --- |
| Isometric | Soil prior to rock or mineral spreading. Targets to quantify soil heterogeneity, including pH, soil texture, soil permeability, cation exchange capacity and base saturation [[255]](#footnote-254) |
| Puro | Soil carbon removal in the absence of ERW activities[[256]](#footnote-255). |

### Table A1-58. ERW storage durability, permanence, and timing of carbon removals

| Protocol | Durability Requirements |
| --- | --- |
| Isometric | At least 10,000 years[[257]](#footnote-256). |
| Puro | Not addressed. |

### Table A1-59. ERW additionality requirements

| Protocol | Additionality |
| --- | --- |
| Isometric | Financial, Regulatory, Market Adoption and Environmental. [[258]](#footnote-257) |
| Puro | Financial and Regulatory[[259]](#footnote-258) |

1. Isometric Direct Air Capture Protocol, section 7.1, table 1 [↑](#footnote-ref-0)
2. Government of Canada, Direct Air Carbon Dioxide Capture and Geological Storage Federal Offset Protocol, section 7, table 1. [↑](#footnote-ref-1)
3. Isometric Direct Air Capture Protocol, section 7.1, table 1 [↑](#footnote-ref-2)
4. Isometric Transportation Emissions Accounting Module [↑](#footnote-ref-3)
5. Government of Canada, Direct Air Carbon Dioxide Capture and Geological Storage Federal Offset Protocol, section 7, table 1. [↑](#footnote-ref-4)
6. Isometric Transportation Emissions Accounting Module [↑](#footnote-ref-5)
7. Government of Canada, Direct Air Carbon Dioxide Capture and Geological Storage Federal Offset Protocol, Equation 20. [↑](#footnote-ref-6)
8. Isometric Energy Use Accounting Module: <https://registry.isometric.com/module/energy-use-accounting/1.2> [↑](#footnote-ref-7)
9. Isometric Energy Use Accounting Module: <https://registry.isometric.com/module/energy-use-accounting/1.2> [↑](#footnote-ref-8)
10. Isometric Energy Use Accounting Module: <https://registry.isometric.com/module/energy-use-accounting/1.2> [↑](#footnote-ref-9)
11. Government of Canada, Direct Air Carbon Dioxide Capture and Geological Storage Federal Offset Protocol, section 7, table 1. [↑](#footnote-ref-10)
12. Government of Canada, Direct Air Carbon Dioxide Capture and Geological Storage Federal Offset Protocol, Equation 15. [↑](#footnote-ref-11)
13. Government of Canada, Direct Air Carbon Dioxide Capture and Geological Storage Federal Offset Protocol, section 6.4.2 [↑](#footnote-ref-12)
14. Isometric Direct Air Capture Protocol, section 7.1, table 1 [↑](#footnote-ref-13)
15. Government of Canada, Direct Air Carbon Dioxide Capture and Geological Storage Federal Offset Protocol, section 7, table 1. [↑](#footnote-ref-14)
16. Isometric Direct Air Capture Protocol, section 7.1, table 1 [↑](#footnote-ref-15)
17. Government of Canada, Direct Air Carbon Dioxide Capture and Geological Storage Federal Offset Protocol, section 7, table 1. [↑](#footnote-ref-16)
18. Isometric Direct Air Capture Protocol, section 7.2 [↑](#footnote-ref-17)
19. Government of Canada, Direct Air Carbon Dioxide Capture and Geological Storage Federal Offset Protocol, section 8.1 [↑](#footnote-ref-18)
20. Isometric Direct Air Capture Protocol, section 8.2.3.4 [↑](#footnote-ref-19)
21. Government of Canada, Direct Air Carbon Dioxide Capture and Geological Storage Federal Offset Protocol, section 8.5 [↑](#footnote-ref-20)
22. Isometric GHG Accounting Module, section 6.1 [↑](#footnote-ref-21)
23. Isometric Direct Air Capture Protocol, section 7.1.1.3 [↑](#footnote-ref-22)
24. Government of Canada, Direct Air Carbon Dioxide Capture and Geological Storage Federal Offset Protocol, section 8.5 [↑](#footnote-ref-23)
25. Isometric Direct Air Capture Protocol, section 8.2 [↑](#footnote-ref-24)
26. Government of Canada, Direct Air Carbon Dioxide Capture and Geological Storage Federal Offset Protocol, section 8.4 [↑](#footnote-ref-25)
27. Isometric Direct Air Capture Protocol, section 7.2 [↑](#footnote-ref-26)
28. Government of Canada, Direct Air Carbon Dioxide Capture and Geological Storage Federal Offset Protocol, section 8.1 [↑](#footnote-ref-27)
29. Isometric Direct Air Capture Protocol, Summary [↑](#footnote-ref-28)
30. Government of Canada, Direct Air Carbon Dioxide Capture and Geological Storage Federal Offset Protocol, section 10.2 [↑](#footnote-ref-29)
31. Isometric Direct Air Capture Protocol, section 6.4 [↑](#footnote-ref-30)
32. Government of Canada, Direct Air Carbon Dioxide Capture and Geological Storage Federal Offset Protocol, section 5 [↑](#footnote-ref-31)
33. Isometric Biochar Production and Storage, section 8.5.1 [↑](#footnote-ref-32)
34. Isometric Embodied Emissions Accounting, section 2.0: system boundaries: <https://registry.isometric.com/module/embodied-emissions/1.0#system-boundaries> [↑](#footnote-ref-33)
35. Puro Biochar Methodology, section 7.4 Quantification of embodied emissions. [↑](#footnote-ref-34)
36. Puro Biochar Methodology, section 7.4 Quantification of embodied emissions. [↑](#footnote-ref-35)
37. VM0044 Biochar Utilization in Soil and Non-Soil Application, section 5: Project Boundaries [↑](#footnote-ref-36)
38. Climate Action Reserve, US and Canada Biochar Protocol, section 4, table 4.1 [↑](#footnote-ref-37)
39. Standard for Carbon Sink Certification for artisan Biochar production, section 13: Emission Portfolio, Carbon Leakage, and Margin of Security. [↑](#footnote-ref-38)
40. Isometric Transportation Emissions Accounting Module [↑](#footnote-ref-39)
41. Puro Biochar Methodology, section 7.2 Scope of Project Emissions [↑](#footnote-ref-40)
42. VM0044 Biochar Utilization in Soil and Non-Soil Application, section 8.3 [↑](#footnote-ref-41)
43. CDM Tool 12: Project and leakage emissions from transportation of freight: <https://cdm.unfccc.int/methodologies/PAmethodologies/tools/am-tool-12-v1.1.0.pdf> [↑](#footnote-ref-42)
44. Climate Action Reserve, US and Canada Biochar Protocol, section 4, table 4.1 [↑](#footnote-ref-43)
45. Climate Action Reserve, US and Canada Biochar Protocol, section 5.2.1.2 [↑](#footnote-ref-44)
46. Standard for Carbon Sink Certification for artisan Biochar production, section 13: Emission Portfolio, Carbon Leakage, and Margin of Security. [↑](#footnote-ref-45)
47. Isometric Energy Use Accounting Module: <https://registry.isometric.com/module/energy-use-accounting/1.2> [↑](#footnote-ref-46)
48. Isometric Energy Use Accounting Module: <https://registry.isometric.com/module/energy-use-accounting/1.2> [↑](#footnote-ref-47)
49. Isometric Energy Use Accounting Module: <https://registry.isometric.com/module/energy-use-accounting> [↑](#footnote-ref-48)
50. Puro Biochar Methodology, section 7.2 Scope of Project Emissions [↑](#footnote-ref-49)
51. Puro Biochar Methodology, section 7.1.10 and 7.1.11 [↑](#footnote-ref-50)
52. VM0044 Biochar Utilization in Soil and Non-Soil Application, section 8.2.2.1 [↑](#footnote-ref-51)
53. CDM Tool 5: Baseline, Project and or leakage emissions from electricity consumption and monitoring of electricity generation: <https://cdm.unfccc.int/methodologies/PAmethodologies/tools/am-tool-05-v3.0.pdf> [↑](#footnote-ref-52)
54. CDM Tool 5: Baseline, Project and or leakage emissions from electricity consumption and monitoring of electricity generation: <https://cdm.unfccc.int/methodologies/PAmethodologies/tools/am-tool-05-v3.0.pdf> [↑](#footnote-ref-53)
55. Climate Action Reserve, US and Canada Biochar Protocol, section 4, table 4.1 [↑](#footnote-ref-54)
56. Climate Action Reserve, US and Canada Biochar Protocol, Equation 5.10 [↑](#footnote-ref-55)
57. Standard for Carbon Sink Certification for artisan Biochar production, section 13: Emission Portfolio, Carbon Leakage, and Margin of Security. [↑](#footnote-ref-56)
58. Isometric Biochar Production and Storage, section 8.5.2 and table 1 [↑](#footnote-ref-57)
59. Puro Biochar Methodology, section 7.3 Quantification of operational emissions [↑](#footnote-ref-58)
60. VM0044 Biochar Utilization in Soil and Non-Soil Application, section 5, table 2 [↑](#footnote-ref-59)
61. Climate Action Reserve, US and Canada Biochar Protocol, section 4, table 4.1 [↑](#footnote-ref-60)
62. Standard for Carbon Sink Certification for artisan Biochar production, section 14: Methane emissions. [↑](#footnote-ref-61)
63. Isometric Biochar Production and Storage, section 7.1, table 1 and section 8.5.3 [↑](#footnote-ref-62)
64. Puro Biochar Methodology, section 7.1 General life cycle assessment requirements [↑](#footnote-ref-63)
65. VM0044 Biochar Utilization in Soil and Non-Soil Application, section 5 [↑](#footnote-ref-64)
66. Climate Action Reserve, US and Canada Biochar Protocol, section 4, table 4.1 [↑](#footnote-ref-65)
67. Isometric Biomass Feedstock Accounting Module, section 2.2 Table 5 [↑](#footnote-ref-66)
68. Isometric Biomass Feedstock Accounting Module, section 2.2 Table 5 and Table 6. [↑](#footnote-ref-67)
69. Puro Biomass Sourcing Criteria and Puro Biochar Protocol section 8.2.2 [↑](#footnote-ref-68)
70. Puro Biochar Protocol section 8.2.2 [↑](#footnote-ref-69)
71. VM0044 Biochar Utilization in Soil and Non-Soil Application, section 8.1.1 [↑](#footnote-ref-70)
72. Climate Action Reserve, US and Canada Biochar Protocol, section 5.1 [↑](#footnote-ref-71)
73. Climate Action Reserve, US and Canada Biochar Protocol, section 5.1 [↑](#footnote-ref-72)
74. Standard for Carbon Sink Certification for artisan Biochar production, section 14.6 and 14.7 [↑](#footnote-ref-73)
75. Isometric Biomass Feedstock Accounting Module, section 3.2 [↑](#footnote-ref-74)
76. Isometric Biomass Feedstock Accounting Module, section 3.2 [↑](#footnote-ref-75)
77. Puro Biochar Protocol, section 8. [↑](#footnote-ref-76)
78. Puro Biochar Protocol, section 8. [↑](#footnote-ref-77)
79. VM0044 Biochar Utilization in Soil and Non-Soil Application, section 8.3 Leakage Emissions [↑](#footnote-ref-78)
80. Climate Action Reserve, US and Canada Biochar Protocol, section 5.3 [↑](#footnote-ref-79)
81. Climate Action Reserve, US and Canada Biochar Protocol, section 5.3 [↑](#footnote-ref-80)
82. Isometric Biochar Production and Storage, section 7.1.1 [↑](#footnote-ref-81)
83. Isometric GHG Accounting Module section 6.1 [↑](#footnote-ref-82)
84. Isometric Biochar Production and Storage, section 7.1.1 [↑](#footnote-ref-83)
85. Puro Biochar Methodology, section 7.1.15 [↑](#footnote-ref-84)
86. Climate Action Reserve, US and Canada Biochar Protocol, equation 5.3 [↑](#footnote-ref-85)
87. Climate Action Reserve, Eligible Biochar Feedstocks List [↑](#footnote-ref-86)
88. Standard for Carbon Sink Certification for artisan Biochar production, section 14.6 and 14.7 [↑](#footnote-ref-87)
89. Isometric Biochar Storage in Agricultural Soils: <https://registry.isometric.com/module/biochar-storage-agricultural-soils/1.1> [↑](#footnote-ref-88)
90. Isometric Biochar Production and Storage Protocol: section 8 Net CDR Calculation <https://registry.isometric.com/protocol/biochar/1.0/ctn_1J1WFNQSE1S0QPD1#calculation-approach-and-reporting-period> [↑](#footnote-ref-89)
91. Puro Biochar Methodology, section 5.1 [↑](#footnote-ref-90)
92. VM0044 Biochar Utilization in Soil and Non-Soil Application, section 8.5 [↑](#footnote-ref-91)
93. Climate Action Reserve, US and Canada Biochar Protocol, section 5.2.2 [↑](#footnote-ref-92)
94. Isometric Biomass Feedstock Accounting Module, section 7.1.1 [↑](#footnote-ref-93)
95. Puro Biomass Sourcing Criteria: <https://7518557.fs1.hubspotusercontent-na1.net/hubfs/7518557/Supplier%20Documents/Puro_Biomass_Sourcing_Criteria.pdf> [↑](#footnote-ref-94)
96. VM0044 Biochar Utilization in Soil and Non-Soil Application, section 4 [↑](#footnote-ref-95)
97. Climate Action Reserve, Eligible Biochar Feedstocks List [↑](#footnote-ref-96)
98. Standard for Carbon Sink Certification for artisan Biochar production, section 6 [↑](#footnote-ref-97)
99. Isometric Biochar Production and Storage, section 7.2 [↑](#footnote-ref-98)
100. Puro Biochar Protocol, section 6.3 [↑](#footnote-ref-99)
101. VM0044 Biochar Utilization in Soil and Non-Soil Application, section 4 [↑](#footnote-ref-100)
102. Climate Action Reserve, US and Canada Biochar Protocol, section 5.1 [↑](#footnote-ref-101)
103. Standard for Carbon Sink Certification for artisan Biochar production, section 3 [↑](#footnote-ref-102)
104. Isometric Biochar Storage in Agricultural Soils Module, section 4: <https://registry.isometric.com/module/biochar-storage-agricultural-soils/1.0#quantification-of-coe> [↑](#footnote-ref-103)
105. Isometric Biochar Storage in Agricultural Soils: <https://registry.isometric.com/module/biochar-storage-agricultural-soils/1.1> [↑](#footnote-ref-104)
106. Puro Biochar Methodology, section 6 [↑](#footnote-ref-105)
107. VM0044 Biochar Utilization in Soil and Non-Soil Application, section 8.2.2.1 [↑](#footnote-ref-106)
108. Climate Action Reserve, US and Canada Biochar Protocol, section 3.5 [↑](#footnote-ref-107)
109. Standard for Carbon Sink Certification for artisan Biochar production, section 12 [↑](#footnote-ref-108)
110. VM0044 Biochar Utilization in Soil and Non-Soil Application, section 7 [↑](#footnote-ref-109)
111. Climate Action Reserve, US and Canada Biochar Protocol, Section 3.4 [↑](#footnote-ref-110)
112. Standard for Carbon Sink Certification for artisan Biochar production, section 18 [↑](#footnote-ref-111)
113. Isometric Biogenic Carbon Capture and Storage, section 7.2 table 1 [↑](#footnote-ref-112)
114. Isometric Embodied Emissions Accounting, section 2.0: system boundaries: <https://registry.isometric.com/module/embodied-emissions/1.0#system-boundaries> [↑](#footnote-ref-113)
115. VMD 0059 CO2 Capture from Bioenergy, section 5.1, figure 1 [↑](#footnote-ref-114)
116. VMD 0059 CO2 Capture from Bioenergy, section 5.2, Appendix 2, table 2 [↑](#footnote-ref-115)
117. VMD 0059 CO2 Capture from Bioenergy, section 5.2, Appendix 2, table 2 [↑](#footnote-ref-116)
118. Gold Standard, Biomass Fermentation with Carbon Capture and Geologic Storage, table 3 P3 and P4 and section 5.2.3 [↑](#footnote-ref-117)
119. Gold Standard, Biomass Fermentation with Carbon Capture and Geologic Storage, table 3 P2 [↑](#footnote-ref-118)
120. Gold Standard, Biomass Fermentation with Carbon Capture and Geologic Storage, table 3 P4 and section 5.11 [↑](#footnote-ref-119)
121. Gold Standard, Biomass Fermentation with Carbon Capture and Geologic Storage, 5.11 [↑](#footnote-ref-120)
122. Isometric Biogenic Carbon Capture and Storage, section 7.6.3.6 [↑](#footnote-ref-121)
123. Isometric Transportation Emissions Accounting Module [↑](#footnote-ref-122)
124. Isometric Transportation Emissions Accounting Module [↑](#footnote-ref-123)
125. VMD 0059 CO2 Capture from Bioenergy, section 5 and section 5.4.3 [↑](#footnote-ref-124)
126. VMD 0059 CO2 Capture from Bioenergy, section 5.4.3.4 [↑](#footnote-ref-125)
127. Gold Standard, Biomass Fermentation with Carbon Capture and Geologic Storage, table 3 P1,P2 and P4 [↑](#footnote-ref-126)
128. Isometric Energy Use Accounting Module: <https://registry.isometric.com/module/energy-use-accounting/1.2> [↑](#footnote-ref-127)
129. Isometric Energy Use Accounting Module: <https://registry.isometric.com/module/energy-use-accounting/1.2> [↑](#footnote-ref-128)
130. Isometric Energy Use Accounting Module: <https://registry.isometric.com/module/energy-use-accounting/1.2> [↑](#footnote-ref-129)
131. VT0010 Emissions from Electricity Consumption and Generation. [↑](#footnote-ref-130)
132. VMD 0059 CO2 Capture from Bioenergy, section 5.3.1 [↑](#footnote-ref-131)
133. Gold Standard, Biomass Fermentation with Carbon Capture and Geologic Storage, table 3 P7 and P8. [↑](#footnote-ref-132)
134. Gold Standard, Biomass Fermentation with Carbon Capture and Geologic Storage, table 3 P6 [↑](#footnote-ref-133)
135. Isometric Biogenic Carbon Capture and Storage, section 7.2 table 1 [↑](#footnote-ref-134)
136. VMD 0059 CO2 Capture from Bioenergy, section 5, table 1 [↑](#footnote-ref-135)
137. VMD 0059 CO2 Capture from Bioenergy, section 5.2, Appendix 2, table 2 [↑](#footnote-ref-136)
138. Gold Standard, Biomass Fermentation with Carbon Capture and Geologic Storage, table 3. [↑](#footnote-ref-137)
139. Isometric Biogenic Carbon Capture and Storage, section 7.6.3.3 [↑](#footnote-ref-138)
140. VMD 0059 CO2 Capture from Bioenergy, section 5.2, Appendix 2, table 2 [↑](#footnote-ref-139)
141. Gold Standard, Biomass Fermentation with Carbon Capture and Geologic Storage, P18 [↑](#footnote-ref-140)
142. Isometric Biomass Feedstock Accounting Module, section 2.2 Table 5 [↑](#footnote-ref-141)
143. Isometric Biomass Feedstock Accounting Module, section 2.2 Table 5 and Table 6. [↑](#footnote-ref-142)
144. VMD 0059 CO2 Capture from Bioenergy, section 5.4 [↑](#footnote-ref-143)
145. Isometric Biomass Feedstock Accounting Module, section 3.2 [↑](#footnote-ref-144)
146. Isometric Biomass Feedstock Accounting Module, section 3.2 [↑](#footnote-ref-145)
147. VMD 0059 CO2 Capture from Bioenergy, section 5.4.3.2 and 5.4.3.3 [↑](#footnote-ref-146)
148. VMD 0059 CO2 Capture from Bioenergy, section 5.4.3.2 and 5.4.3.3 [↑](#footnote-ref-147)
149. Gold Standard, Biomass Fermentation with Carbon Capture and Geologic Storage, section 5.7 and Appendix 1 [↑](#footnote-ref-148)
150. CDM TOOL16 Project and Leakage Emissions from Biomass, section 5.1.1 [↑](#footnote-ref-149)
151. Gold Standard, Biomass Fermentation with Carbon Capture and Geologic Storage, section 5.7 [↑](#footnote-ref-150)
152. Isometric Biogenic Carbon Capture and Storage, section 7.3.1 [↑](#footnote-ref-151)
153. Isometric Biogenic Carbon Capture and Storage, section 7.3.3 [↑](#footnote-ref-152)
154. Isometric GHG Accounting Module section 6.1 [↑](#footnote-ref-153)
155. Gold Standard, Biomass Fermentation with Carbon Capture and Geologic Storage, section 5.6.2 [↑](#footnote-ref-154)
156. Isometric Biogenic Carbon Capture and Storage, section 7.6 [↑](#footnote-ref-155)
157. VMD 0059 CO2 Capture from Bioenergy section 5.1 [↑](#footnote-ref-156)
158. Gold Standard, Biomass Fermentation with Carbon Capture and Geologic Storage, section 5.8 [↑](#footnote-ref-157)
159. Isometric Biomass Feedstock Accounting Module, section 7.1.1 [↑](#footnote-ref-158)
160. VMD 0059 CO2 Capture from Bioenergy Appendix 1. [↑](#footnote-ref-159)
161. Gold Standard, Biomass Fermentation with Carbon Capture and Geologic Storage, Appendix 1 [↑](#footnote-ref-160)
162. Isometric Biogenic Carbon Capture and Storage, section 7.4 [↑](#footnote-ref-161)
163. VMD 0059 CO2 Capture from Bioenergy, section 5.2 [↑](#footnote-ref-162)
164. Gold Standard, Biomass Fermentation with Carbon Capture and Geologic Storage, section 5.5 [↑](#footnote-ref-163)
165. Isometric Biogenic Carbon Capture and Storage, Summary [↑](#footnote-ref-164)
166. Isometric Biogenic Carbon Capture and Storage, section 6.4 [↑](#footnote-ref-165)
167. VMD 0059 CO2 Capture from Bioenergy, section 5.2 [↑](#footnote-ref-166)
168. Gold Standard, Biomass Fermentation with Carbon Capture and Geologic Storage, section 5.3 [↑](#footnote-ref-167)
169. Isometric Open System Ex situ Mineralization Protocol, section 10.5.4 [↑](#footnote-ref-168)
170. Isometric Embodied Emissions Accounting Module [↑](#footnote-ref-169)
171. Isometric Open System Ex situ Mineralization Protocol, section 10.2 [↑](#footnote-ref-170)
172. Puro Carbonate materials Methodology, section 4.03 [↑](#footnote-ref-171)
173. VM0043 CO2 Utilization in Concrete Production section 5 [↑](#footnote-ref-172)
174. Gold Standard Carbon Mineralization Using Reactive Mineral Waste, section 5.7 c [↑](#footnote-ref-173)
175. Gold Standard Carbon Mineralization Using Reactive Mineral Waste, section 5.7 c [↑](#footnote-ref-174)
176. Isometric Open System Ex situ Mineralization Protocol, section 10.6.2 [↑](#footnote-ref-175)
177. Isometric Transportation Emissions Accounting Module [↑](#footnote-ref-176)
178. Isometric Transportation Emissions Accounting Module [↑](#footnote-ref-177)
179. Puro Carbonate materials Methodology, section 4.06 [↑](#footnote-ref-178)
180. VM0043 CO2 Utilization in Concrete Production section 8.2.4, Table 3 [↑](#footnote-ref-179)
181. Gold Standard Carbon Mineralization Using Reactive Mineral Waste, section 5.7 b [↑](#footnote-ref-180)
182. Isometric Energy Use Accounting Module: <https://registry.isometric.com/module/energy-use-accounting/1.2> [↑](#footnote-ref-181)
183. Isometric Energy Use Accounting Module: <https://registry.isometric.com/module/energy-use-accounting/1.2> [↑](#footnote-ref-182)
184. Isometric Energy Use Accounting Module: <https://registry.isometric.com/module/energy-use-accounting/1.2> [↑](#footnote-ref-183)
185. Puro Carbonate materials Methodology, section 5.3 [↑](#footnote-ref-184)
186. CDM Tool 7: To calculate the emission factor for an electricity system. [↑](#footnote-ref-185)
187. CDM Tool 5: Baseline, Project and or leakage emissions from electricity consumption and monitoring of electricity generation: <https://cdm.unfccc.int/methodologies/PAmethodologies/tools/am-tool-05-v3.0.pdf> [↑](#footnote-ref-186)
188. VM0043 CO2 Utilization in Concrete Production section 8.2.2 [↑](#footnote-ref-187)
189. Gold Standard Carbon Mineralization Using Reactive Mineral Waste, section 5.7.3 [↑](#footnote-ref-188)
190. Gold Standard Carbon Mineralization Using Reactive Mineral Waste, section 5.12 parameter 9 [↑](#footnote-ref-189)
191. Gold Standard Tool 01: Project or Leakage Emissions from Fossil Fuel Combustion. [↑](#footnote-ref-190)
192. Puro Carbonate materials Methodology, section 4.06 [↑](#footnote-ref-191)
193. VM0043 CO2 Utilization in Concrete Production section 5 [↑](#footnote-ref-192)
194. Gold Standard Carbon Mineralization Using Reactive Mineral Waste, section 5.2 table 3 [↑](#footnote-ref-193)
195. Isometric Open System Ex situ Mineralization Protocol, section 10.5.2, table 6 [↑](#footnote-ref-194)
196. Puro Carbonate materials Methodology, section 5.3.2 [↑](#footnote-ref-195)
197. Gold Standard Carbon Mineralization Using Reactive Mineral Waste, section 5.2 table 3 [↑](#footnote-ref-196)
198. Isometric Open System Ex situ Mineralization Protocol, section 10.5.2 [↑](#footnote-ref-197)
199. Isometric Open System Ex situ Mineralization Protocol, section 10.5.2, table 6 [↑](#footnote-ref-198)
200. Puro Carbonate materials Methodology, section 5.4 [↑](#footnote-ref-199)
201. Puro Carbonate materials Methodology, section 5.4 [↑](#footnote-ref-200)
202. VM0043 CO2 Utilization in Concrete Production section 8.1.2 [↑](#footnote-ref-201)
203. VM0043 CO2 Utilization in Concrete Production section 8.1.2 [↑](#footnote-ref-202)
204. Gold Standard Carbon Mineralization Using Reactive Mineral Waste, section 5.5 [↑](#footnote-ref-203)
205. Gold Standard Carbon Mineralization Using Reactive Mineral Waste, section 5.5 [↑](#footnote-ref-204)
206. Isometric Open System Ex situ Mineralization Protocol, section 10.5.7 [↑](#footnote-ref-205)
207. Gold Standard Carbon Mineralization Using Reactive Mineral Waste, section 5.8 [↑](#footnote-ref-206)
208. Isometric GHG Accounting Module section 6.1 [↑](#footnote-ref-207)
209. Puro Carbonate materials Methodology, section 4.05 [↑](#footnote-ref-208)
210. Puro Carbonate materials Methodology, section 4.04 [↑](#footnote-ref-209)
211. Isometric Open System Ex situ Mineralization Protocol, section 10.5 [↑](#footnote-ref-210)
212. Puro Carbonate materials Methodology, section 5.1 and 5.2 [↑](#footnote-ref-211)
213. VM0043 CO2 Utilization in Concrete Production section 8.4 [↑](#footnote-ref-212)
214. Gold Standard Carbon Mineralization Using Reactive Mineral Waste, section 5.9 [↑](#footnote-ref-213)
215. Gold Standard Carbon Mineralization Using Reactive Mineral Waste, section 5.6 [↑](#footnote-ref-214)
216. Isometric Rock and Mineral Characterization Module [↑](#footnote-ref-215)
217. Puro Carbonate materials Methodology, section 4.04 [↑](#footnote-ref-216)
218. VM0043 CO2 Utilization in Concrete Production section 8.4 [↑](#footnote-ref-217)
219. Gold Standard Carbon Mineralization Using Reactive Mineral Waste, section 3.2.4 and 3.2.6 [↑](#footnote-ref-218)
220. Isometric Open System Ex situ Mineralization Protocol, section 10.3 [↑](#footnote-ref-219)
221. Puro Carbonate materials Methodology, section 5.4.7 [↑](#footnote-ref-220)
222. VM0043 CO2 Utilization in Concrete Production section 6 [↑](#footnote-ref-221)
223. Gold Standard Carbon Mineralization Using Reactive Mineral Waste, section 5.4 [↑](#footnote-ref-222)
224. Isometric Open System Ex situ Mineralization Protocol, section 12.1 [↑](#footnote-ref-223)
225. Puro Carbonate materials Methodology, section 1 [↑](#footnote-ref-224)
226. Gold Standard Carbon Mineralization Using Reactive Mineral Waste, summary [↑](#footnote-ref-225)
227. Section 2.5.3 of the Isometric Standard [↑](#footnote-ref-226)
228. VM0043 CO2 Utilization in Concrete Production section 7 [↑](#footnote-ref-227)
229. Gold Standard Carbon Mineralization Using Reactive Mineral Waste, section 5.3 [↑](#footnote-ref-228)
230. Isometric Enhanced Weathering in Agriculture, section 7.1 table 1 [↑](#footnote-ref-229)
231. Puro Enhanced Rock Weathering, section 5.1 [↑](#footnote-ref-230)
232. Isometric Enhanced Weathering in Agriculture, section 7.4.3.5.2 [↑](#footnote-ref-231)
233. Isometric Transportation Emissions Accounting Module [↑](#footnote-ref-232)
234. Isometric Transportation Emissions Accounting Module [↑](#footnote-ref-233)
235. Puro Enhanced Rock Weathering, section 5.1 [↑](#footnote-ref-234)
236. Isometric Energy Use Accounting Module: <https://registry.isometric.com/module/energy-use-accounting/1.2> [↑](#footnote-ref-235)
237. Isometric Energy Use Accounting Module: <https://registry.isometric.com/module/energy-use-accounting/1.2> [↑](#footnote-ref-236)
238. Isometric Energy Use Accounting Module: <https://registry.isometric.com/module/energy-use-accounting/1.2> [↑](#footnote-ref-237)
239. Puro Enhanced Rock Weathering, section 6.5.1 [↑](#footnote-ref-238)
240. Isometric Enhanced Weathering in Agriculture, section 7.1 table 1 [↑](#footnote-ref-239)
241. Puro Enhanced Rock Weathering, section 5.1 [↑](#footnote-ref-240)
242. Puro Enhanced Rock Weathering, section 6.7.2 [↑](#footnote-ref-241)
243. Isometric Enhanced Weathering in Agriculture, section 7.1 table 1 [↑](#footnote-ref-242)
244. Isometric Enhanced Weathering in Agriculture, section 7.4.2 [↑](#footnote-ref-243)
245. Puro Enhanced Rock Weathering, section 5.1 [↑](#footnote-ref-244)
246. Puro Enhanced Rock Weathering, section 6.7.2 [↑](#footnote-ref-245)
247. Isometric Enhanced Weathering in Agriculture, section 7.4.3.4 [↑](#footnote-ref-246)
248. Puro Enhanced Rock Weathering, section 5.3 [↑](#footnote-ref-247)
249. Isometric GHG Accounting Module section 6.1 [↑](#footnote-ref-248)
250. Puro Enhanced Rock Weathering, section 5.1.6 [↑](#footnote-ref-249)
251. Isometric Enhanced Weathering in Agriculture, section 7.3 [↑](#footnote-ref-250)
252. Puro Enhanced Rock Weathering, section 6.1 [↑](#footnote-ref-251)
253. Isometric Rock and Mineral Characterization Module [↑](#footnote-ref-252)
254. Puro Enhanced Rock Weathering, section 4.2 and 7.4.4 [↑](#footnote-ref-253)
255. Isometric Enhanced Weathering in Agriculture, section 9.3.4.3 [↑](#footnote-ref-254)
256. Puro Enhanced Rock Weathering, section 3.2 [↑](#footnote-ref-255)
257. Isometric Enhanced Weathering in Agriculture, section 9.1 [↑](#footnote-ref-256)
258. Isometric Enhanced Weathering in Agriculture, section 6.4 [↑](#footnote-ref-257)
259. Puro Enhanced Rock Weathering, section 3.2 [↑](#footnote-ref-258)
