# Supplementary material
Source: Research Square preprint supplement (doi:10.21203/rs.3.rs-9956382/v1)

## Graphical Abstract


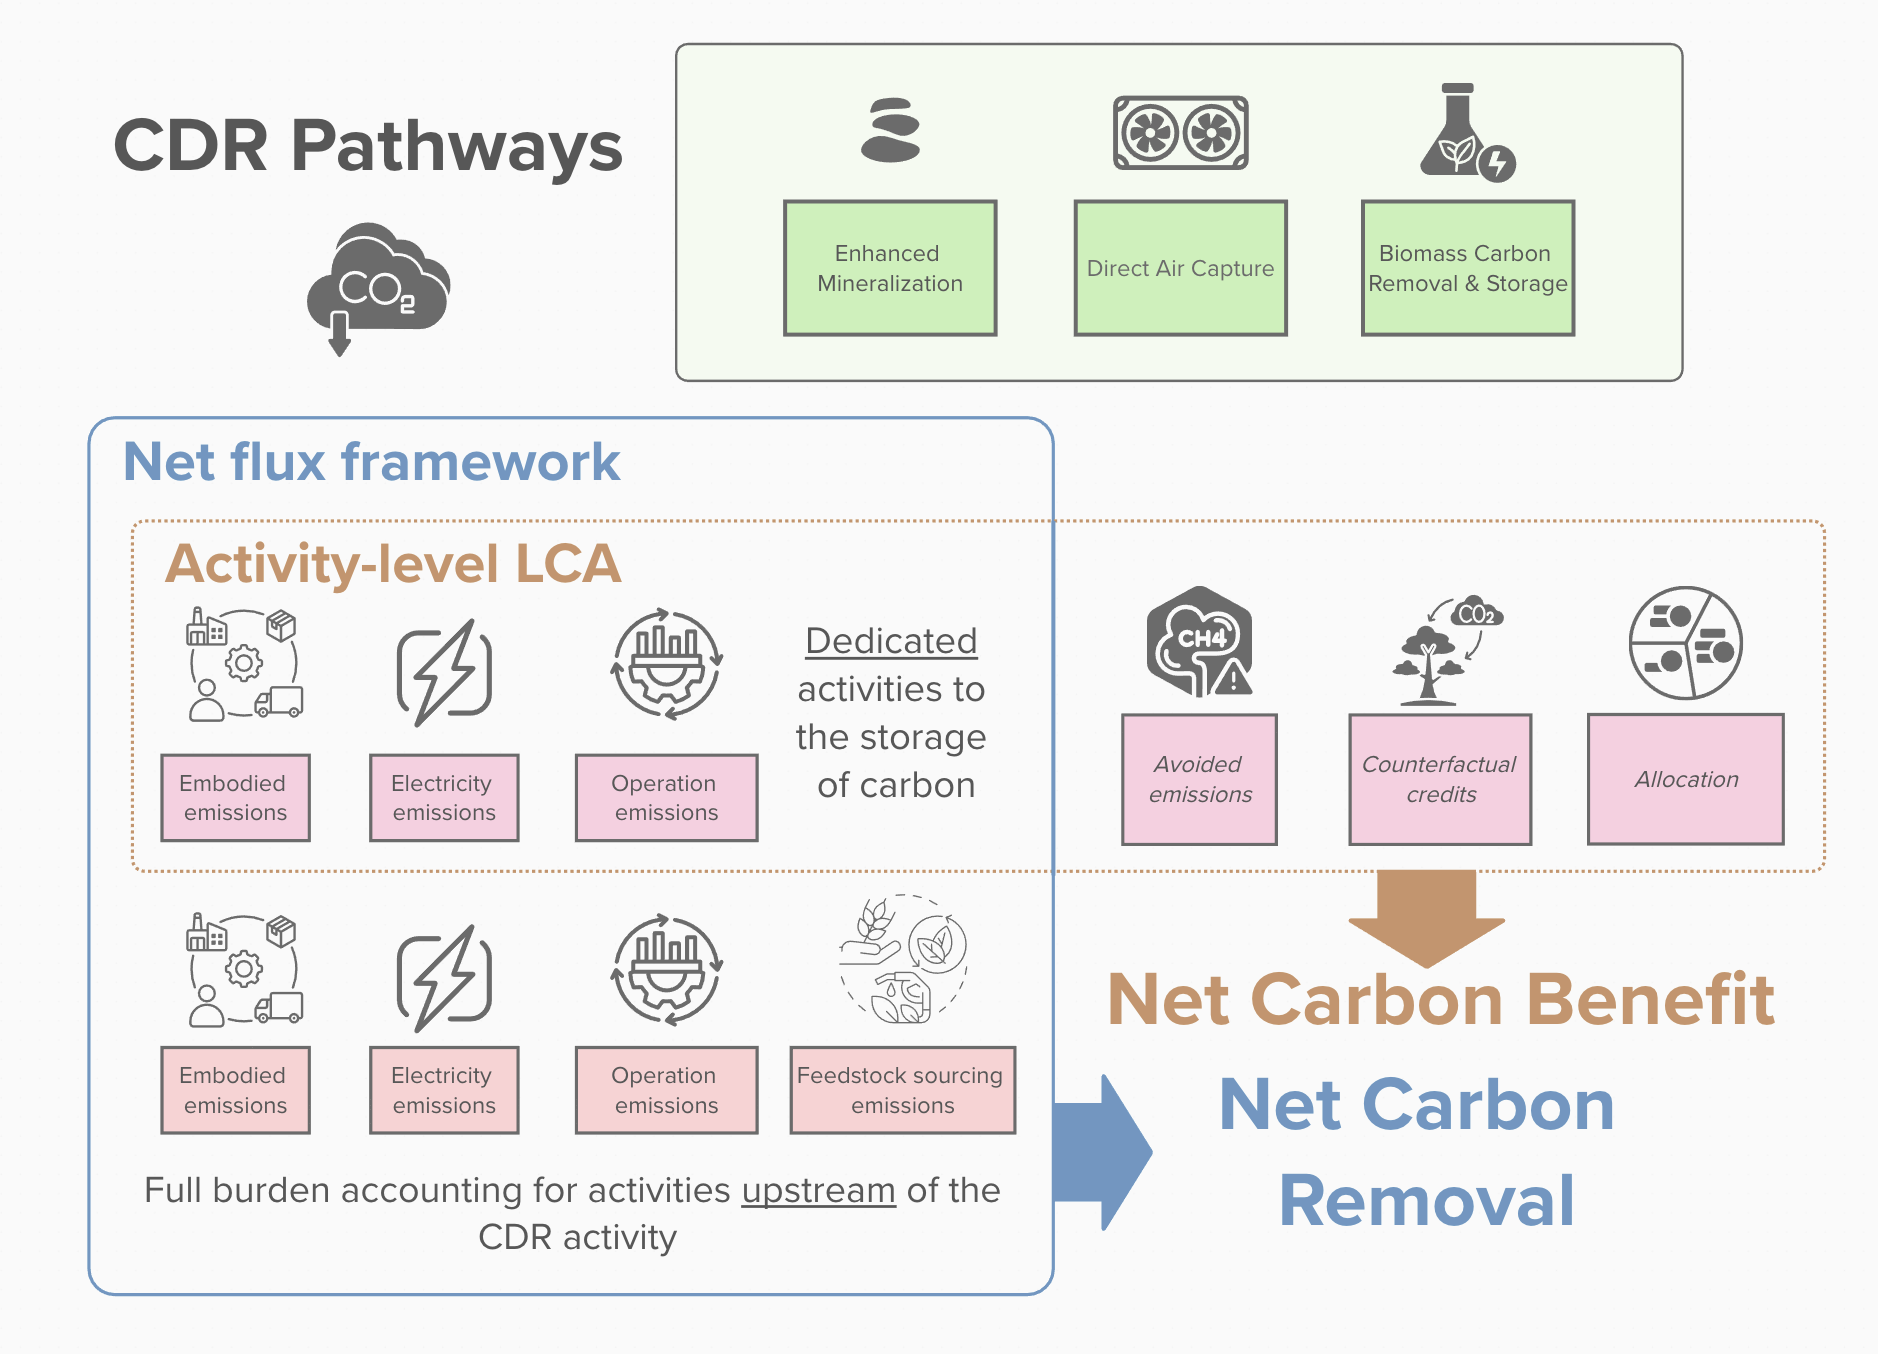

Supplement: Supplementary file 1 [file 06fd62f8269c8d457938b3d3.docx]
